# Supplementary material
Source: publisher figshare collection journal article supplement (https://tandf.figshare.com/ndownloader/files/17676338)
Supplement: Supplementary file 1 [file 17676338]

Supporting Information for:

**Foaming in aqueous solutions of zwitterionic surfactant in presence of monovalent salts: the specific ion effect**

Shailesh R Varade and Pallab Ghosh*

Department of Chemical Engineering

Indian Institute of Technology Guwahati

Guwahati – 781039, Assam, India

*Author to whom all correspondence should be addressed.

E-mail: pallabg@iitg.ac.in

Tel: +91 361 2582253

Fax: +91 361 2582291

| 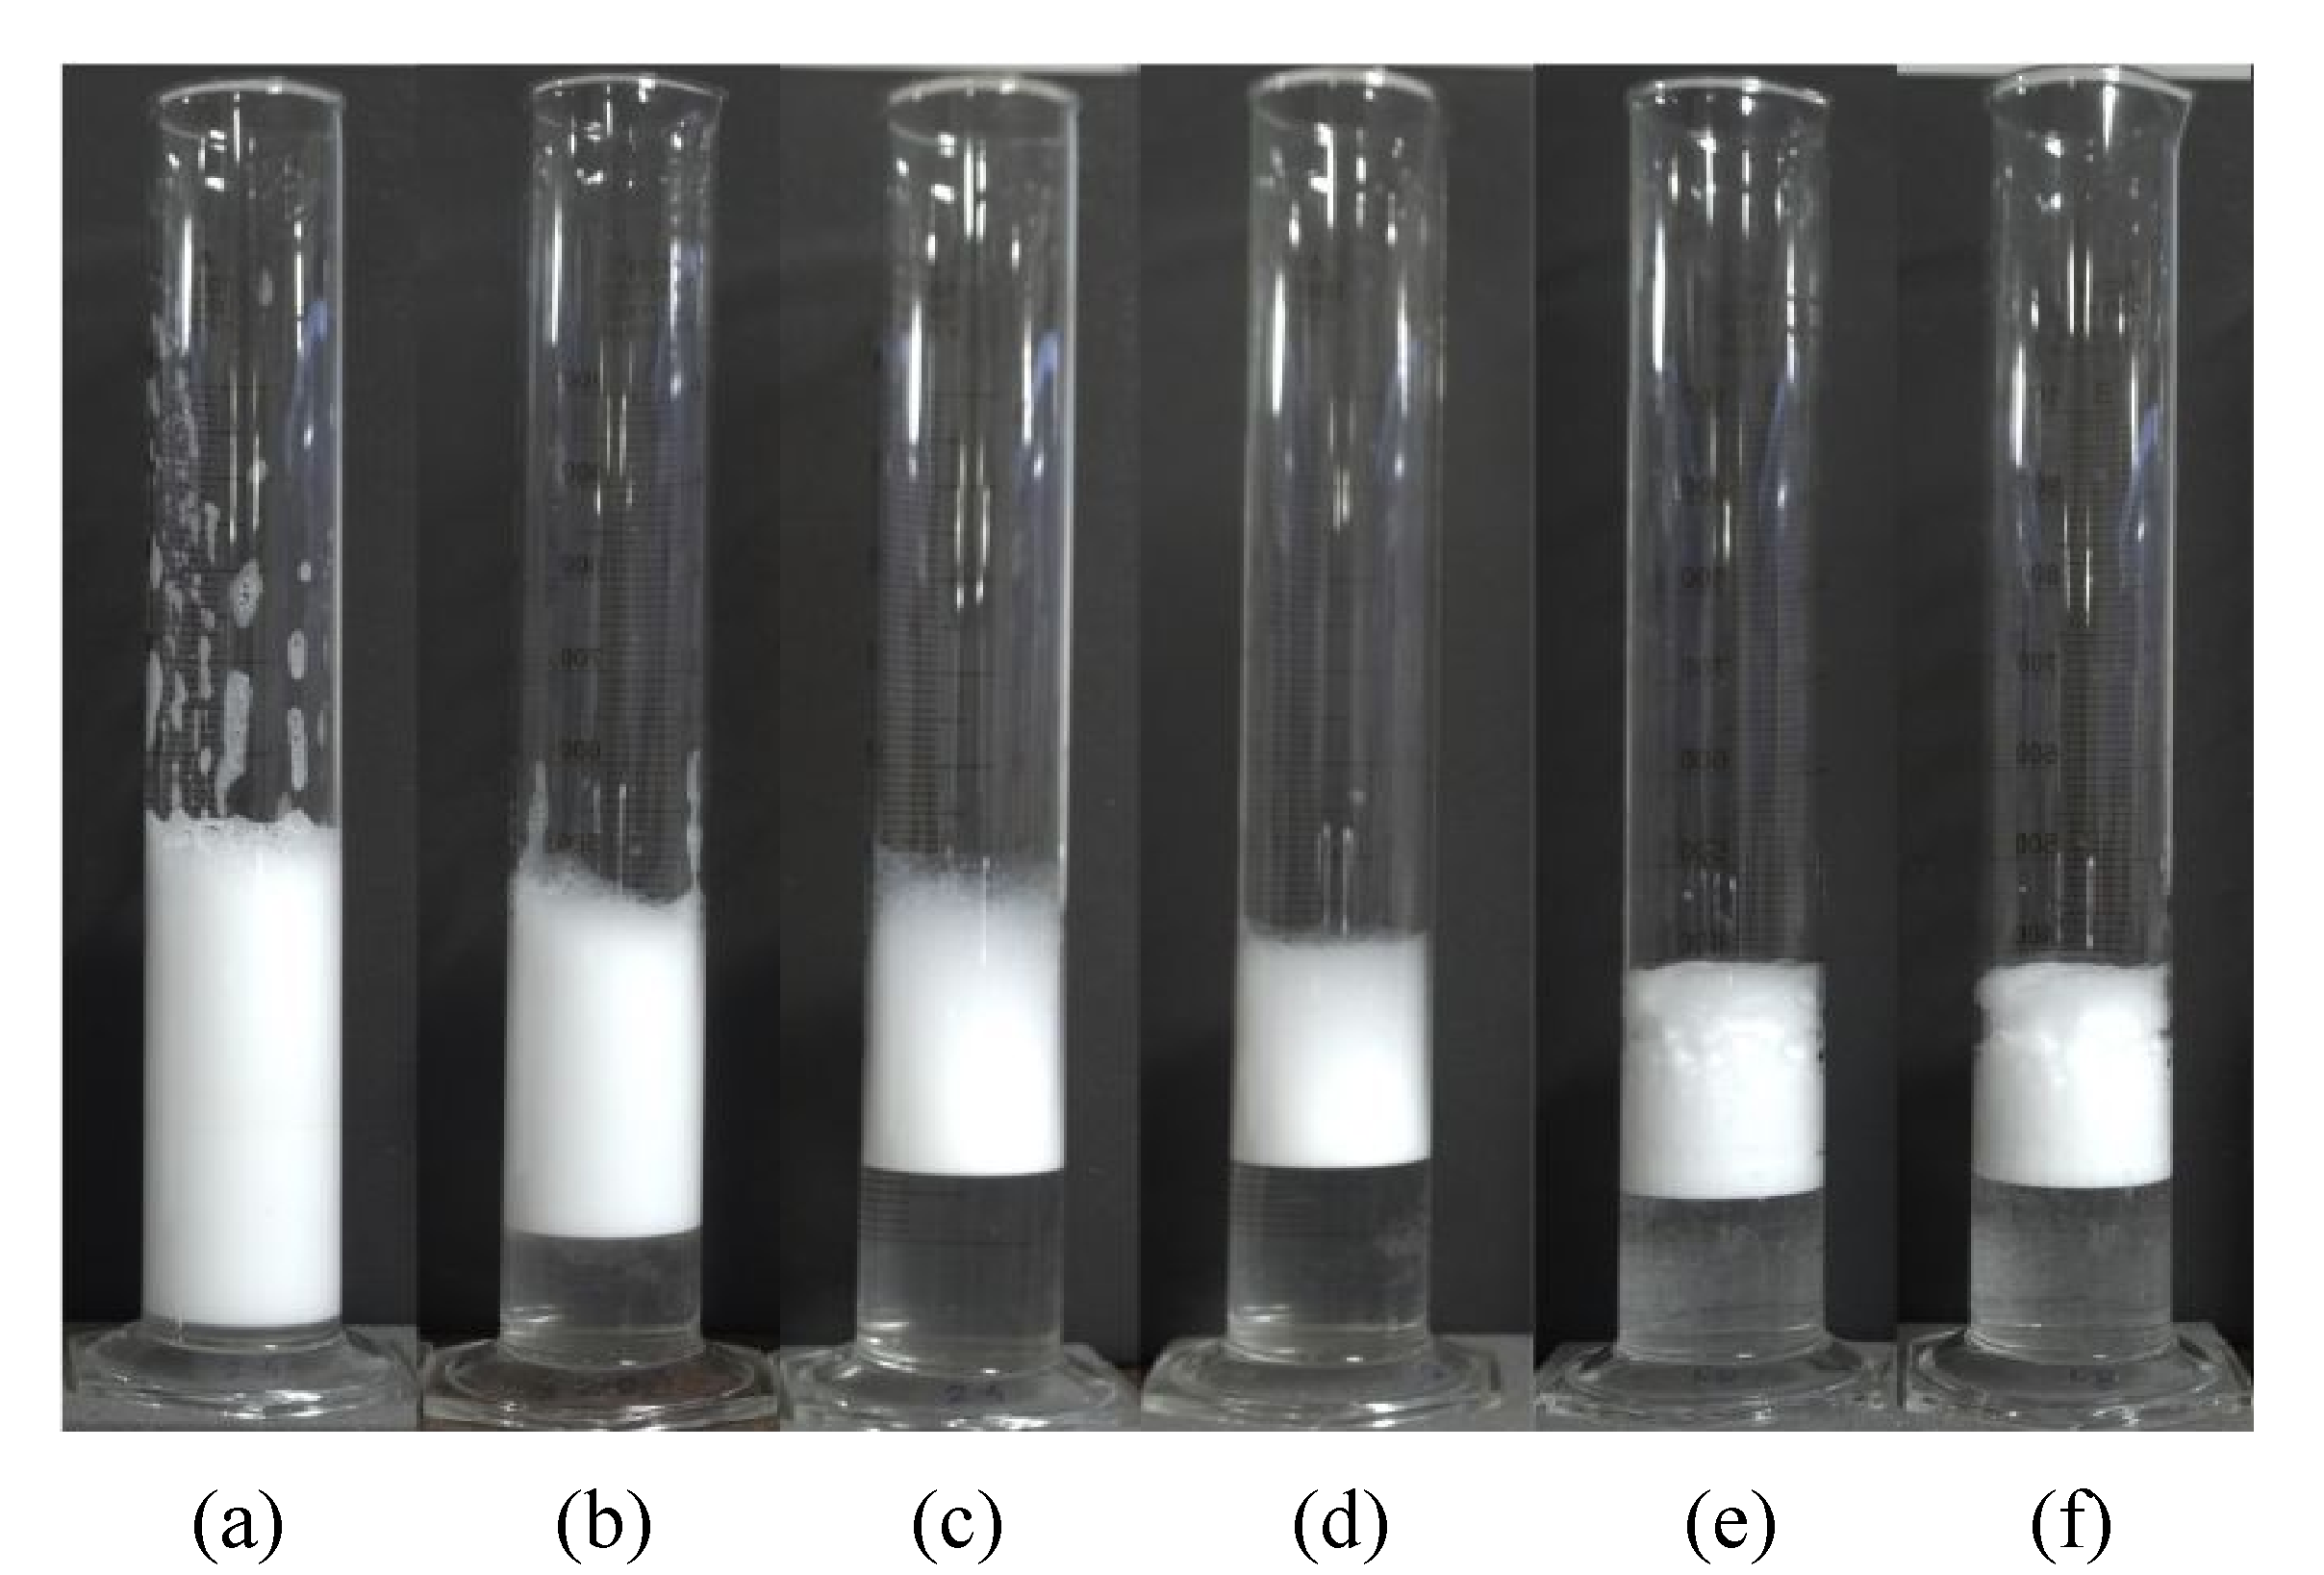 |
| --- |
| **Figure S1.** Photographs of foams prepared from 2 mol m–3 DDAPS and 50 mol m–3 LiCl. Decrease in foam volume can be observed from (a) to (f) over a period of 60 min, at 10 min time interval. |

| 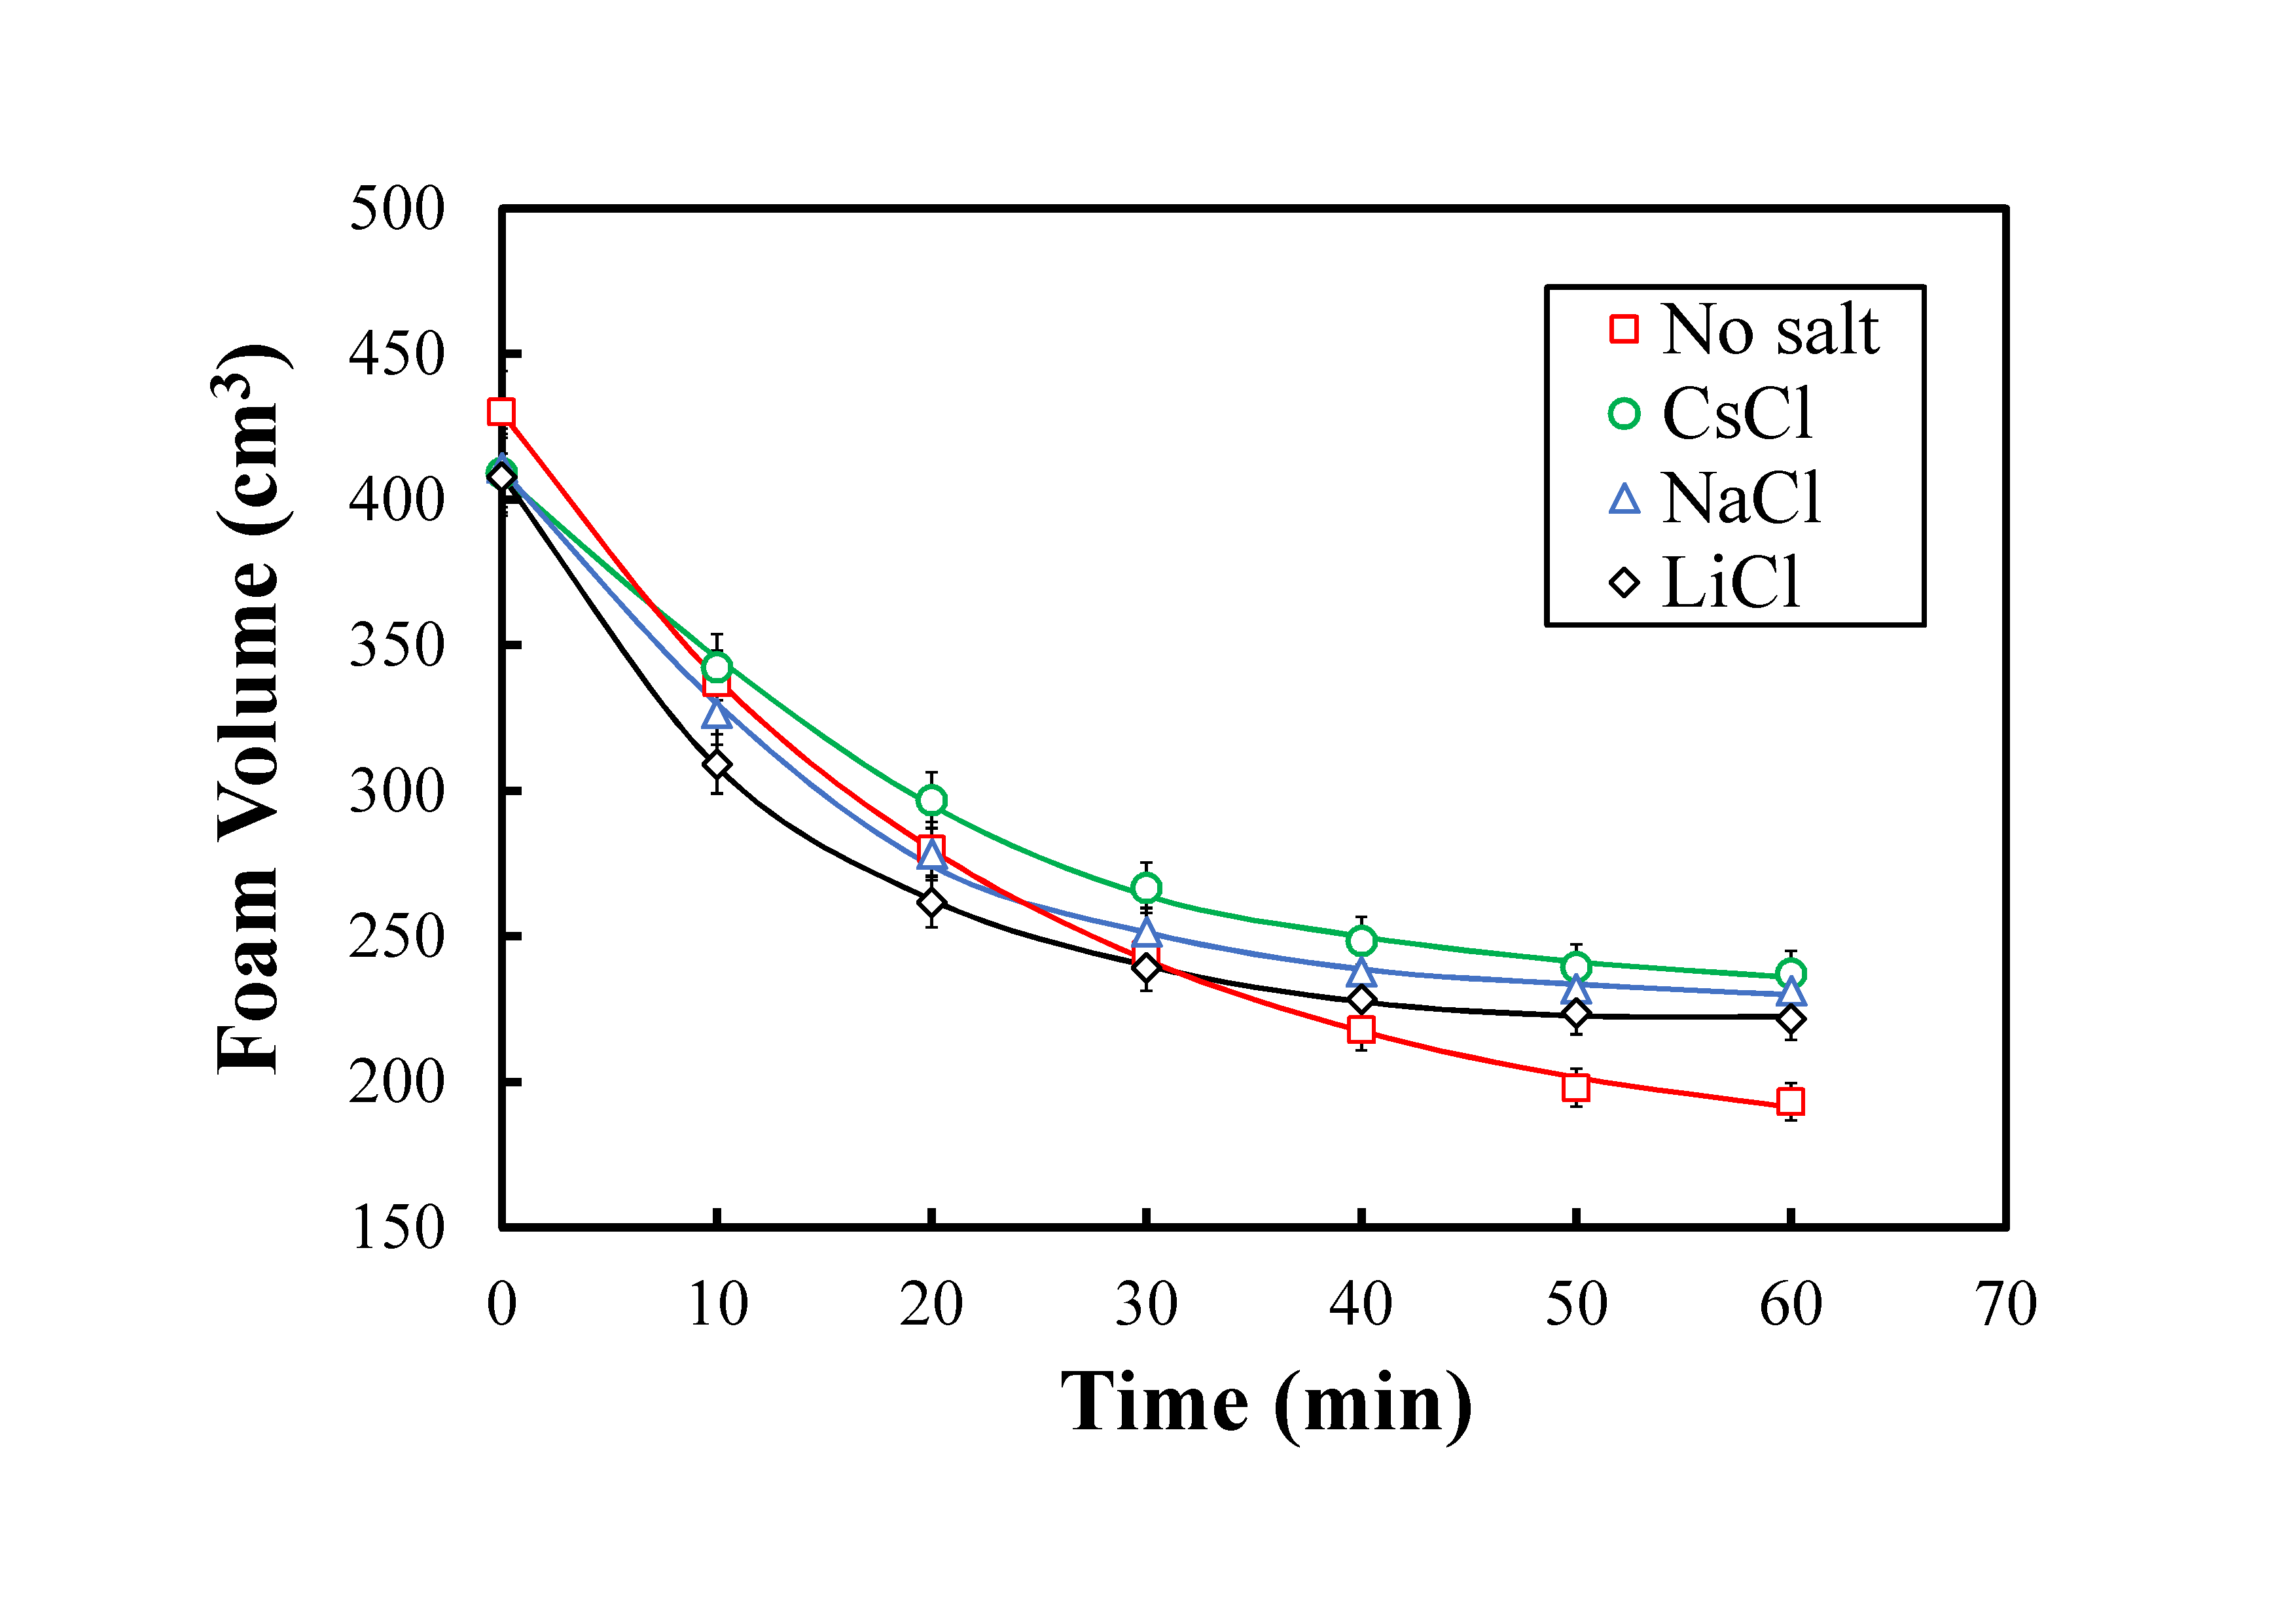 | 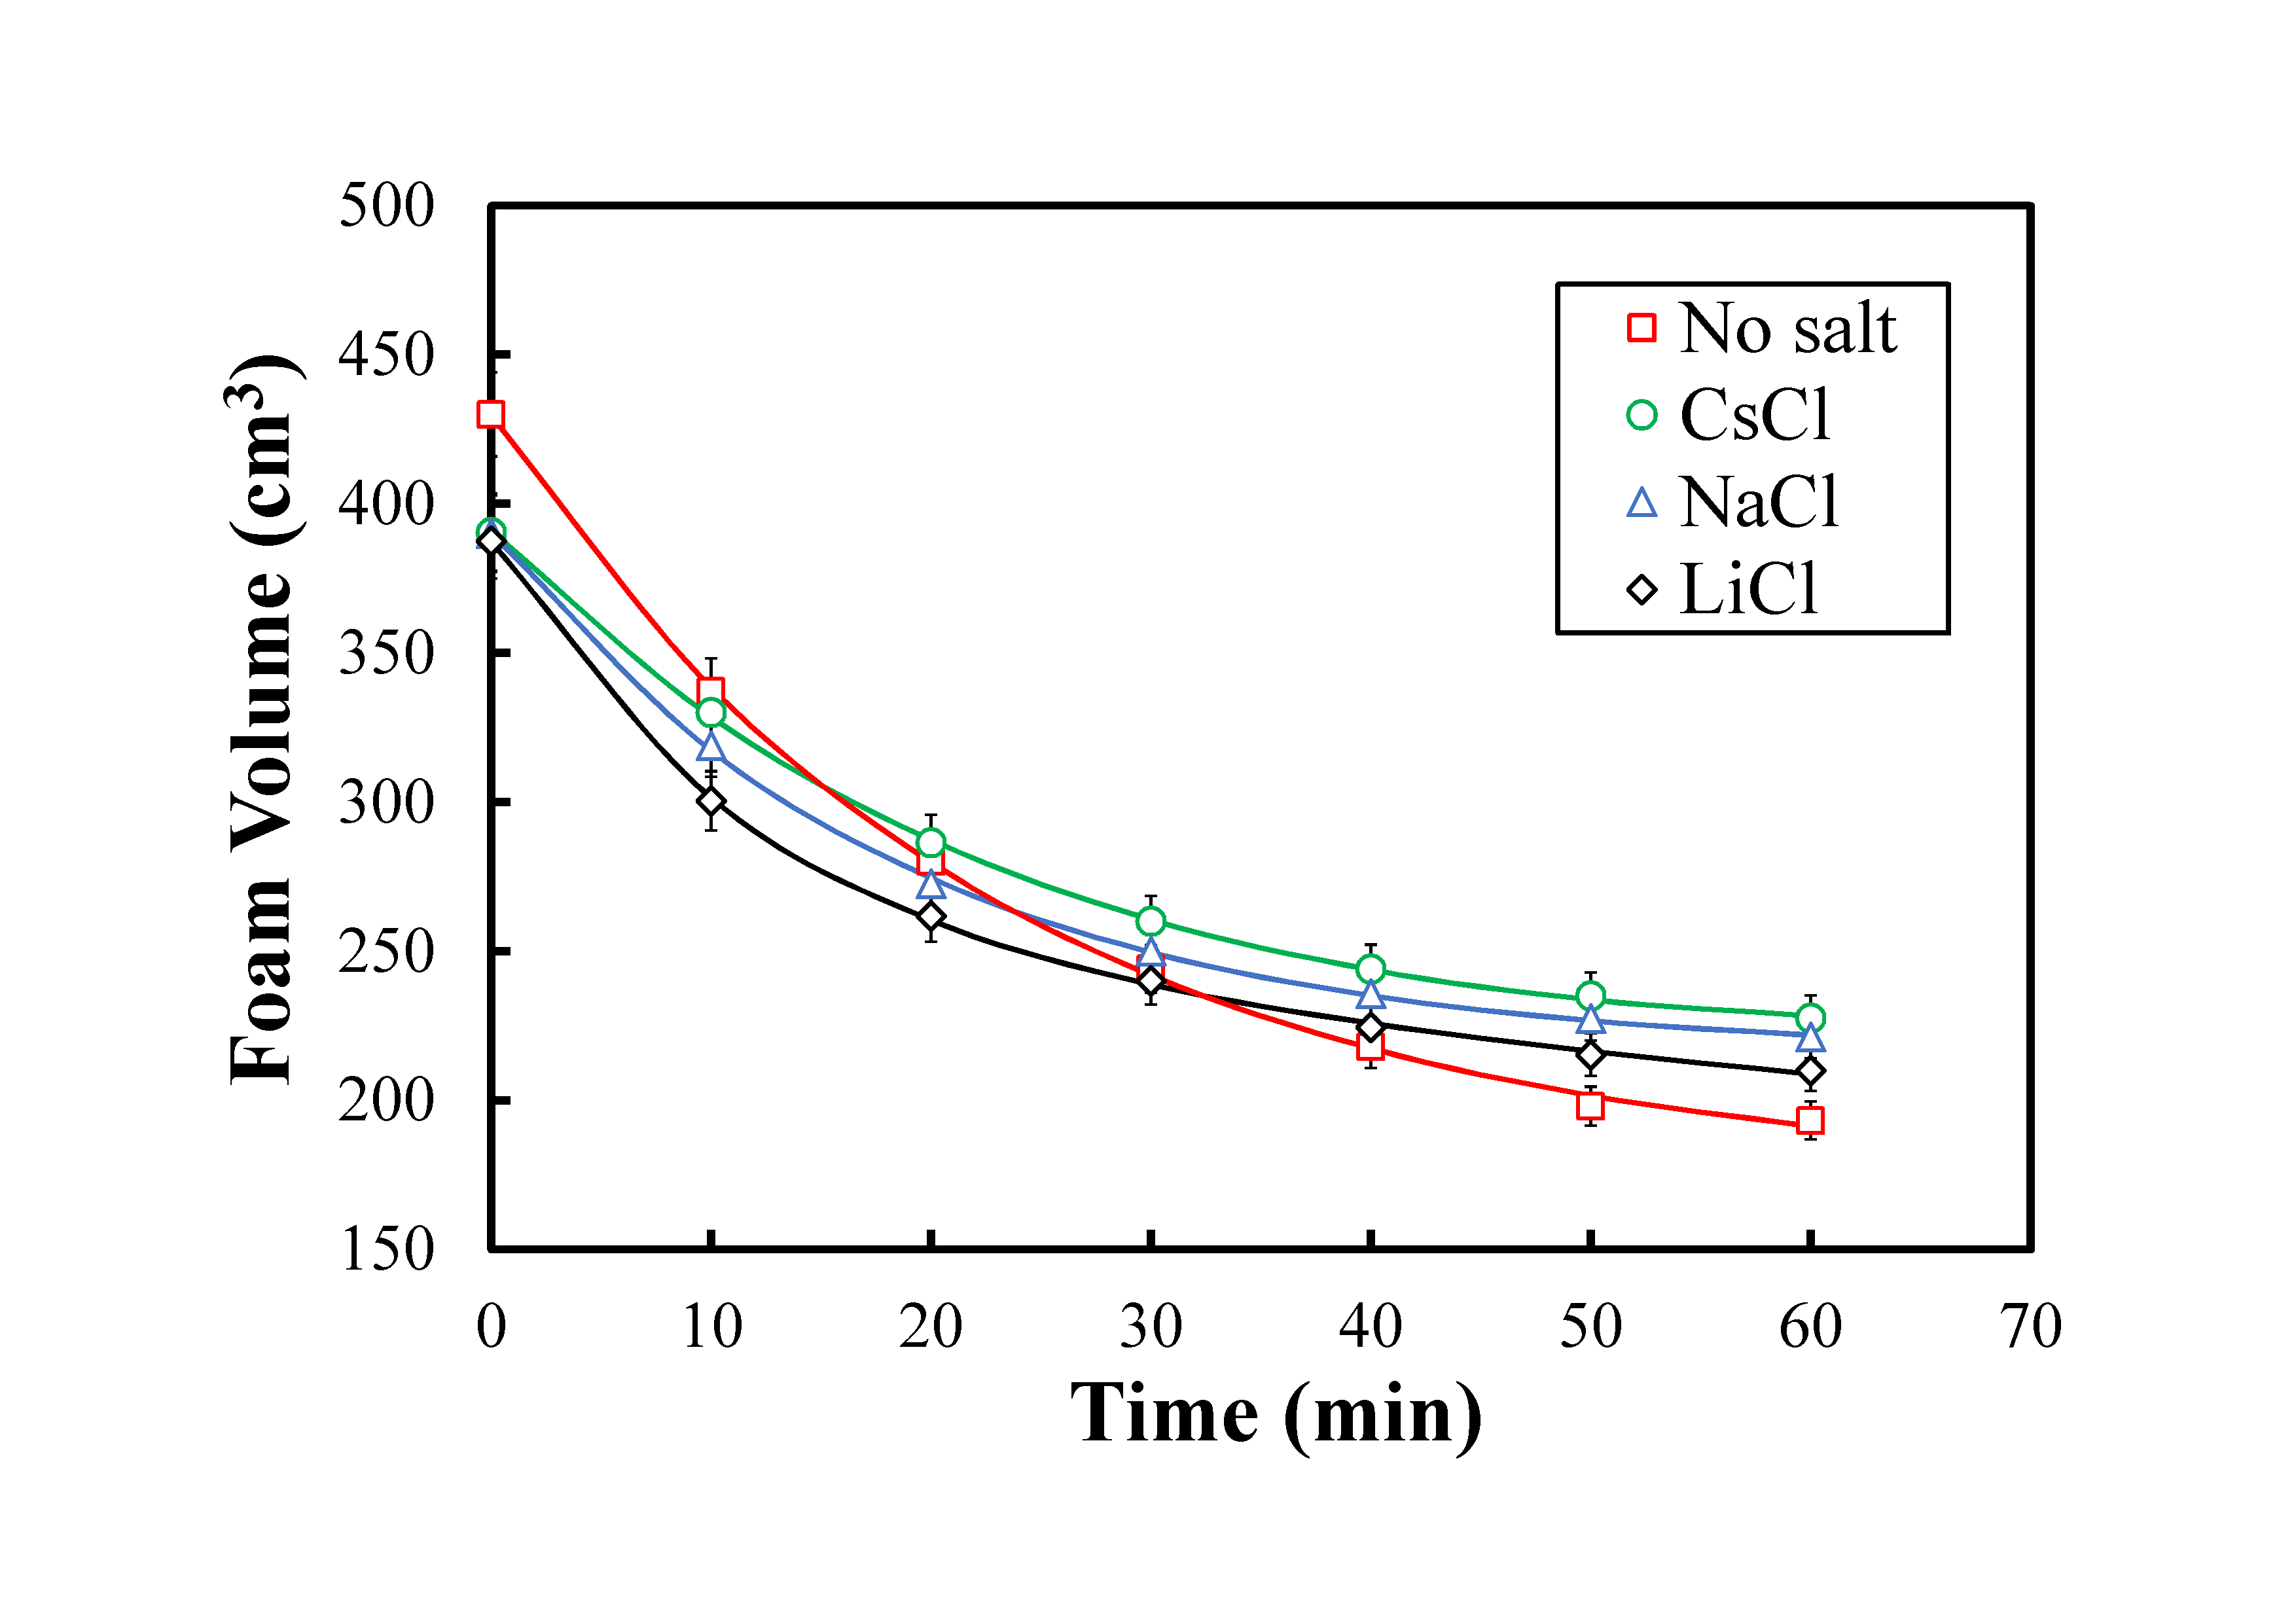 |
| --- | --- |
| (a) | (b) |
| 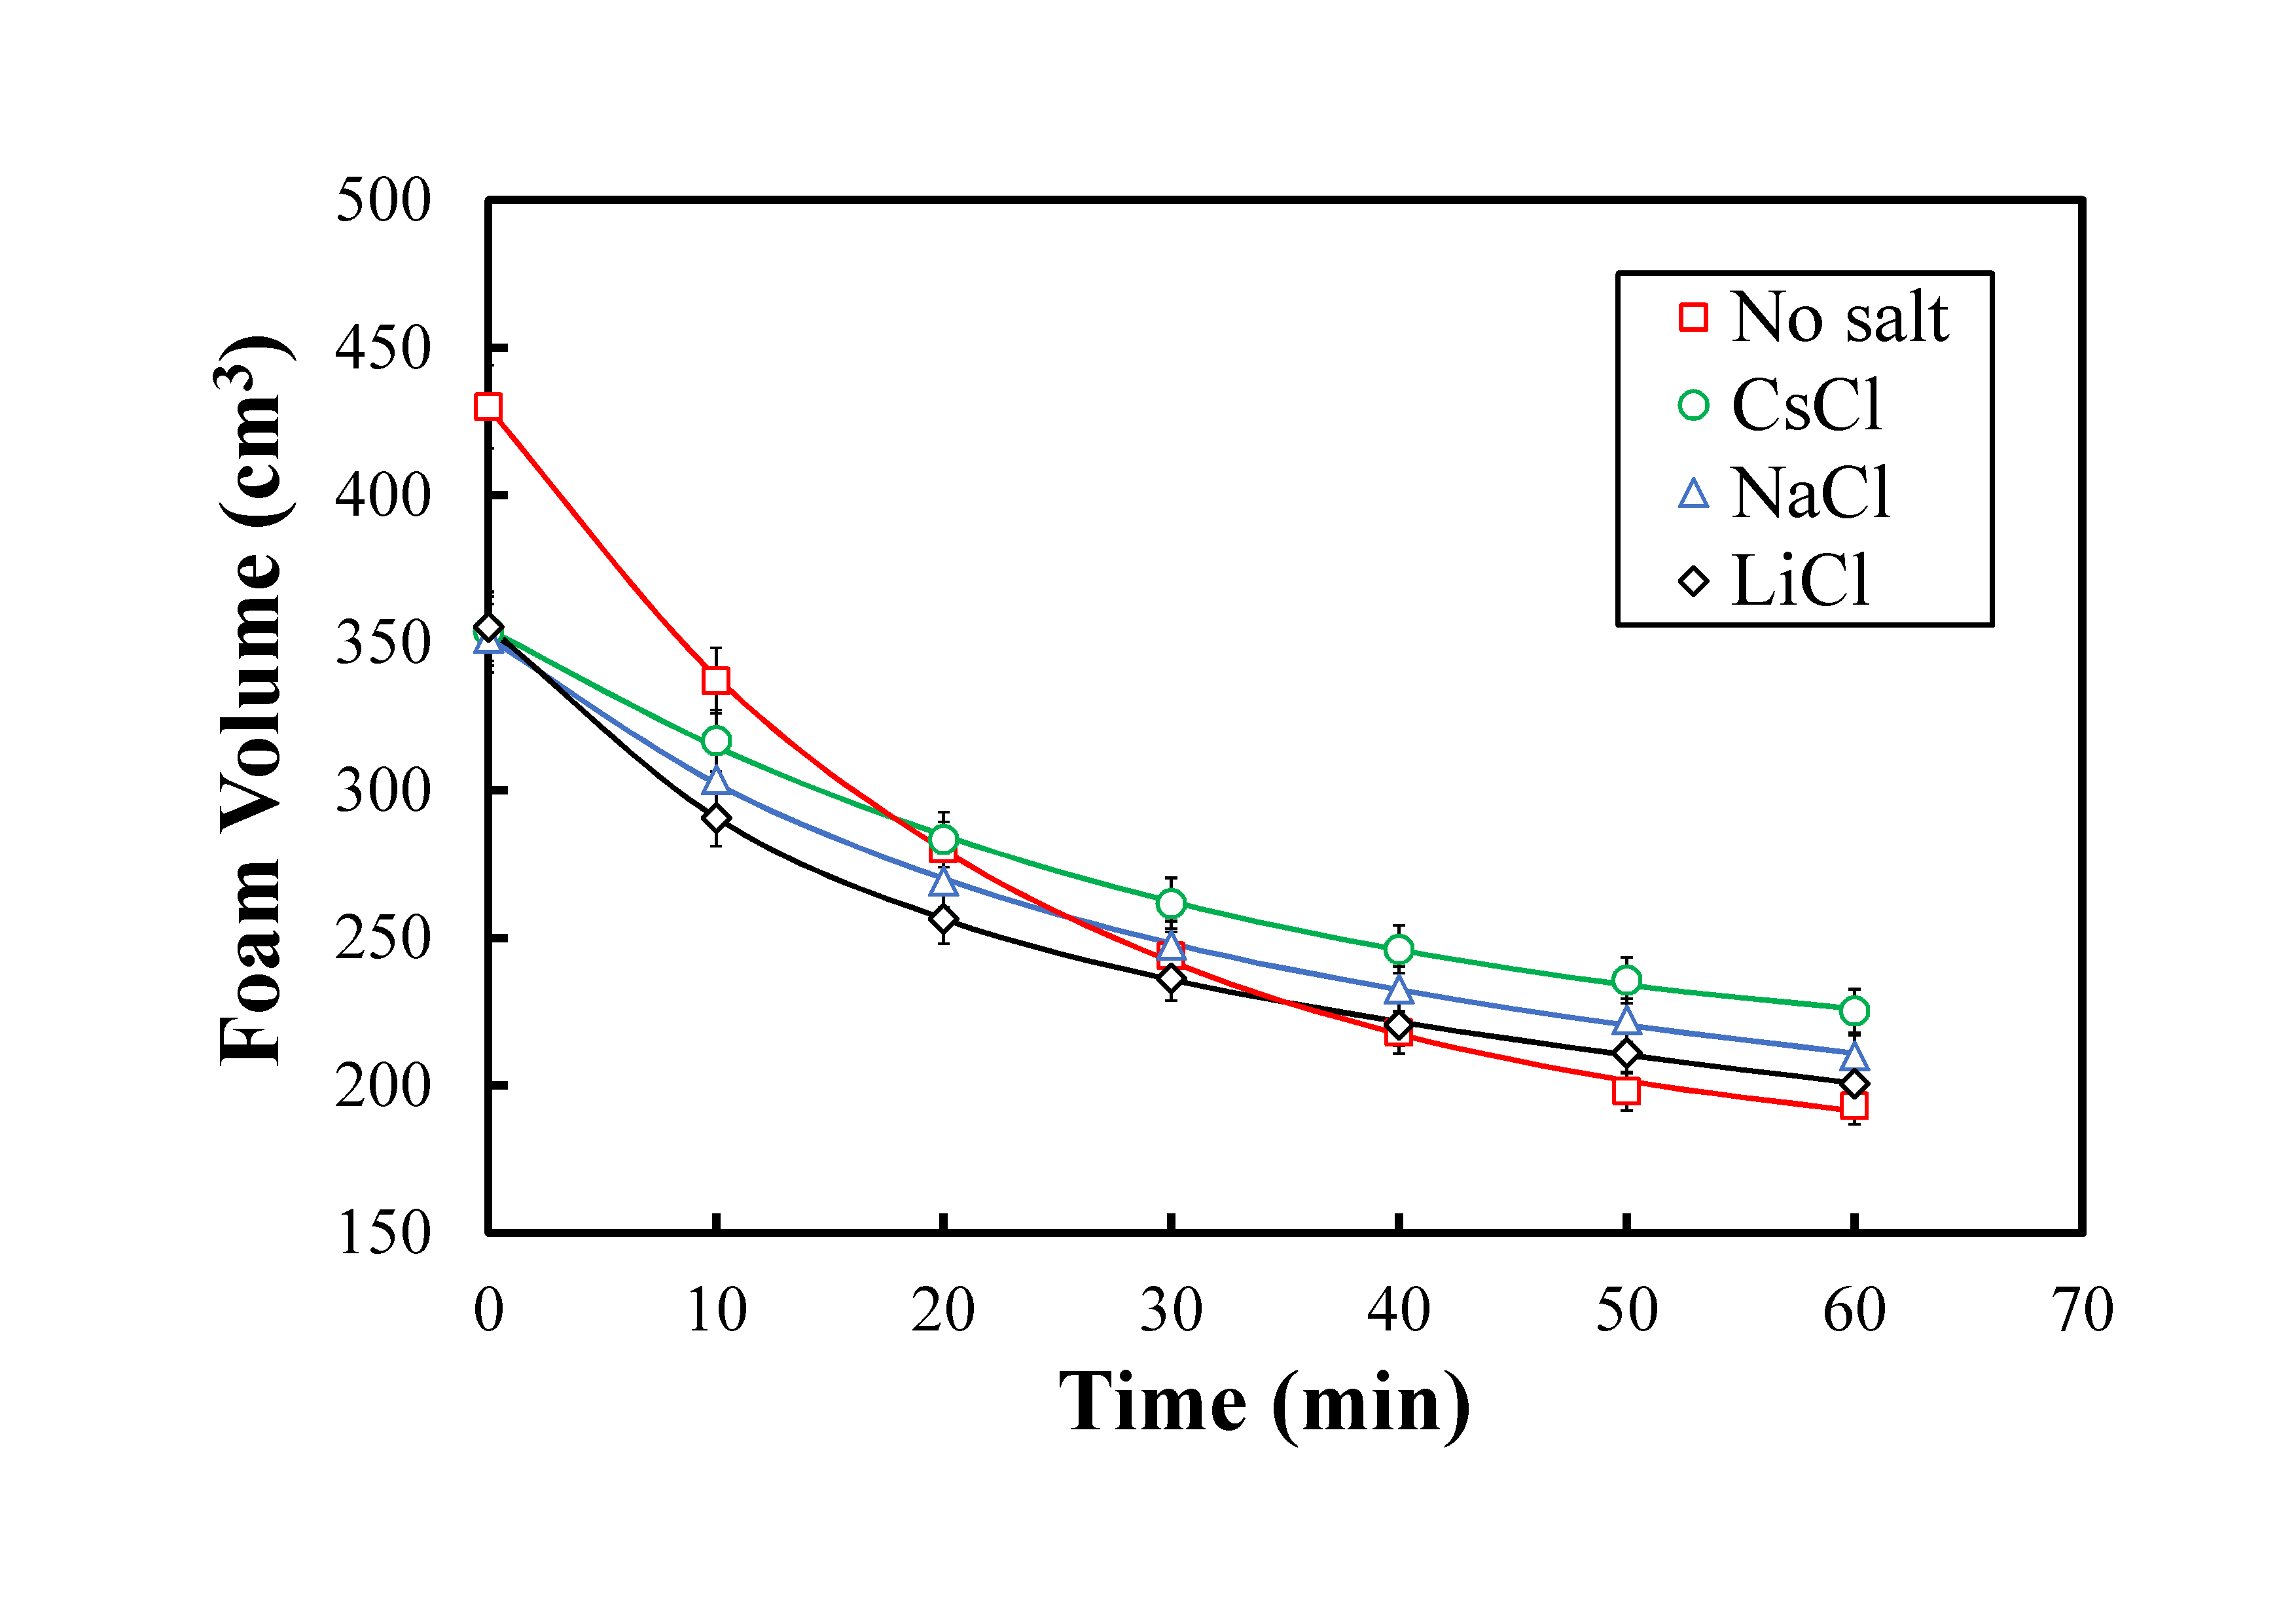 | |
| (c) | |
| **Figure S2.** A comparative study of the lifetime of foams at 0.6 mol m–3 DDAPS at (a) 10, (b) 50, and (c) 100 mol m–3 CsCl, NaCl, and LiCl. The solid lines indicate the di-exponential fits. | |

| 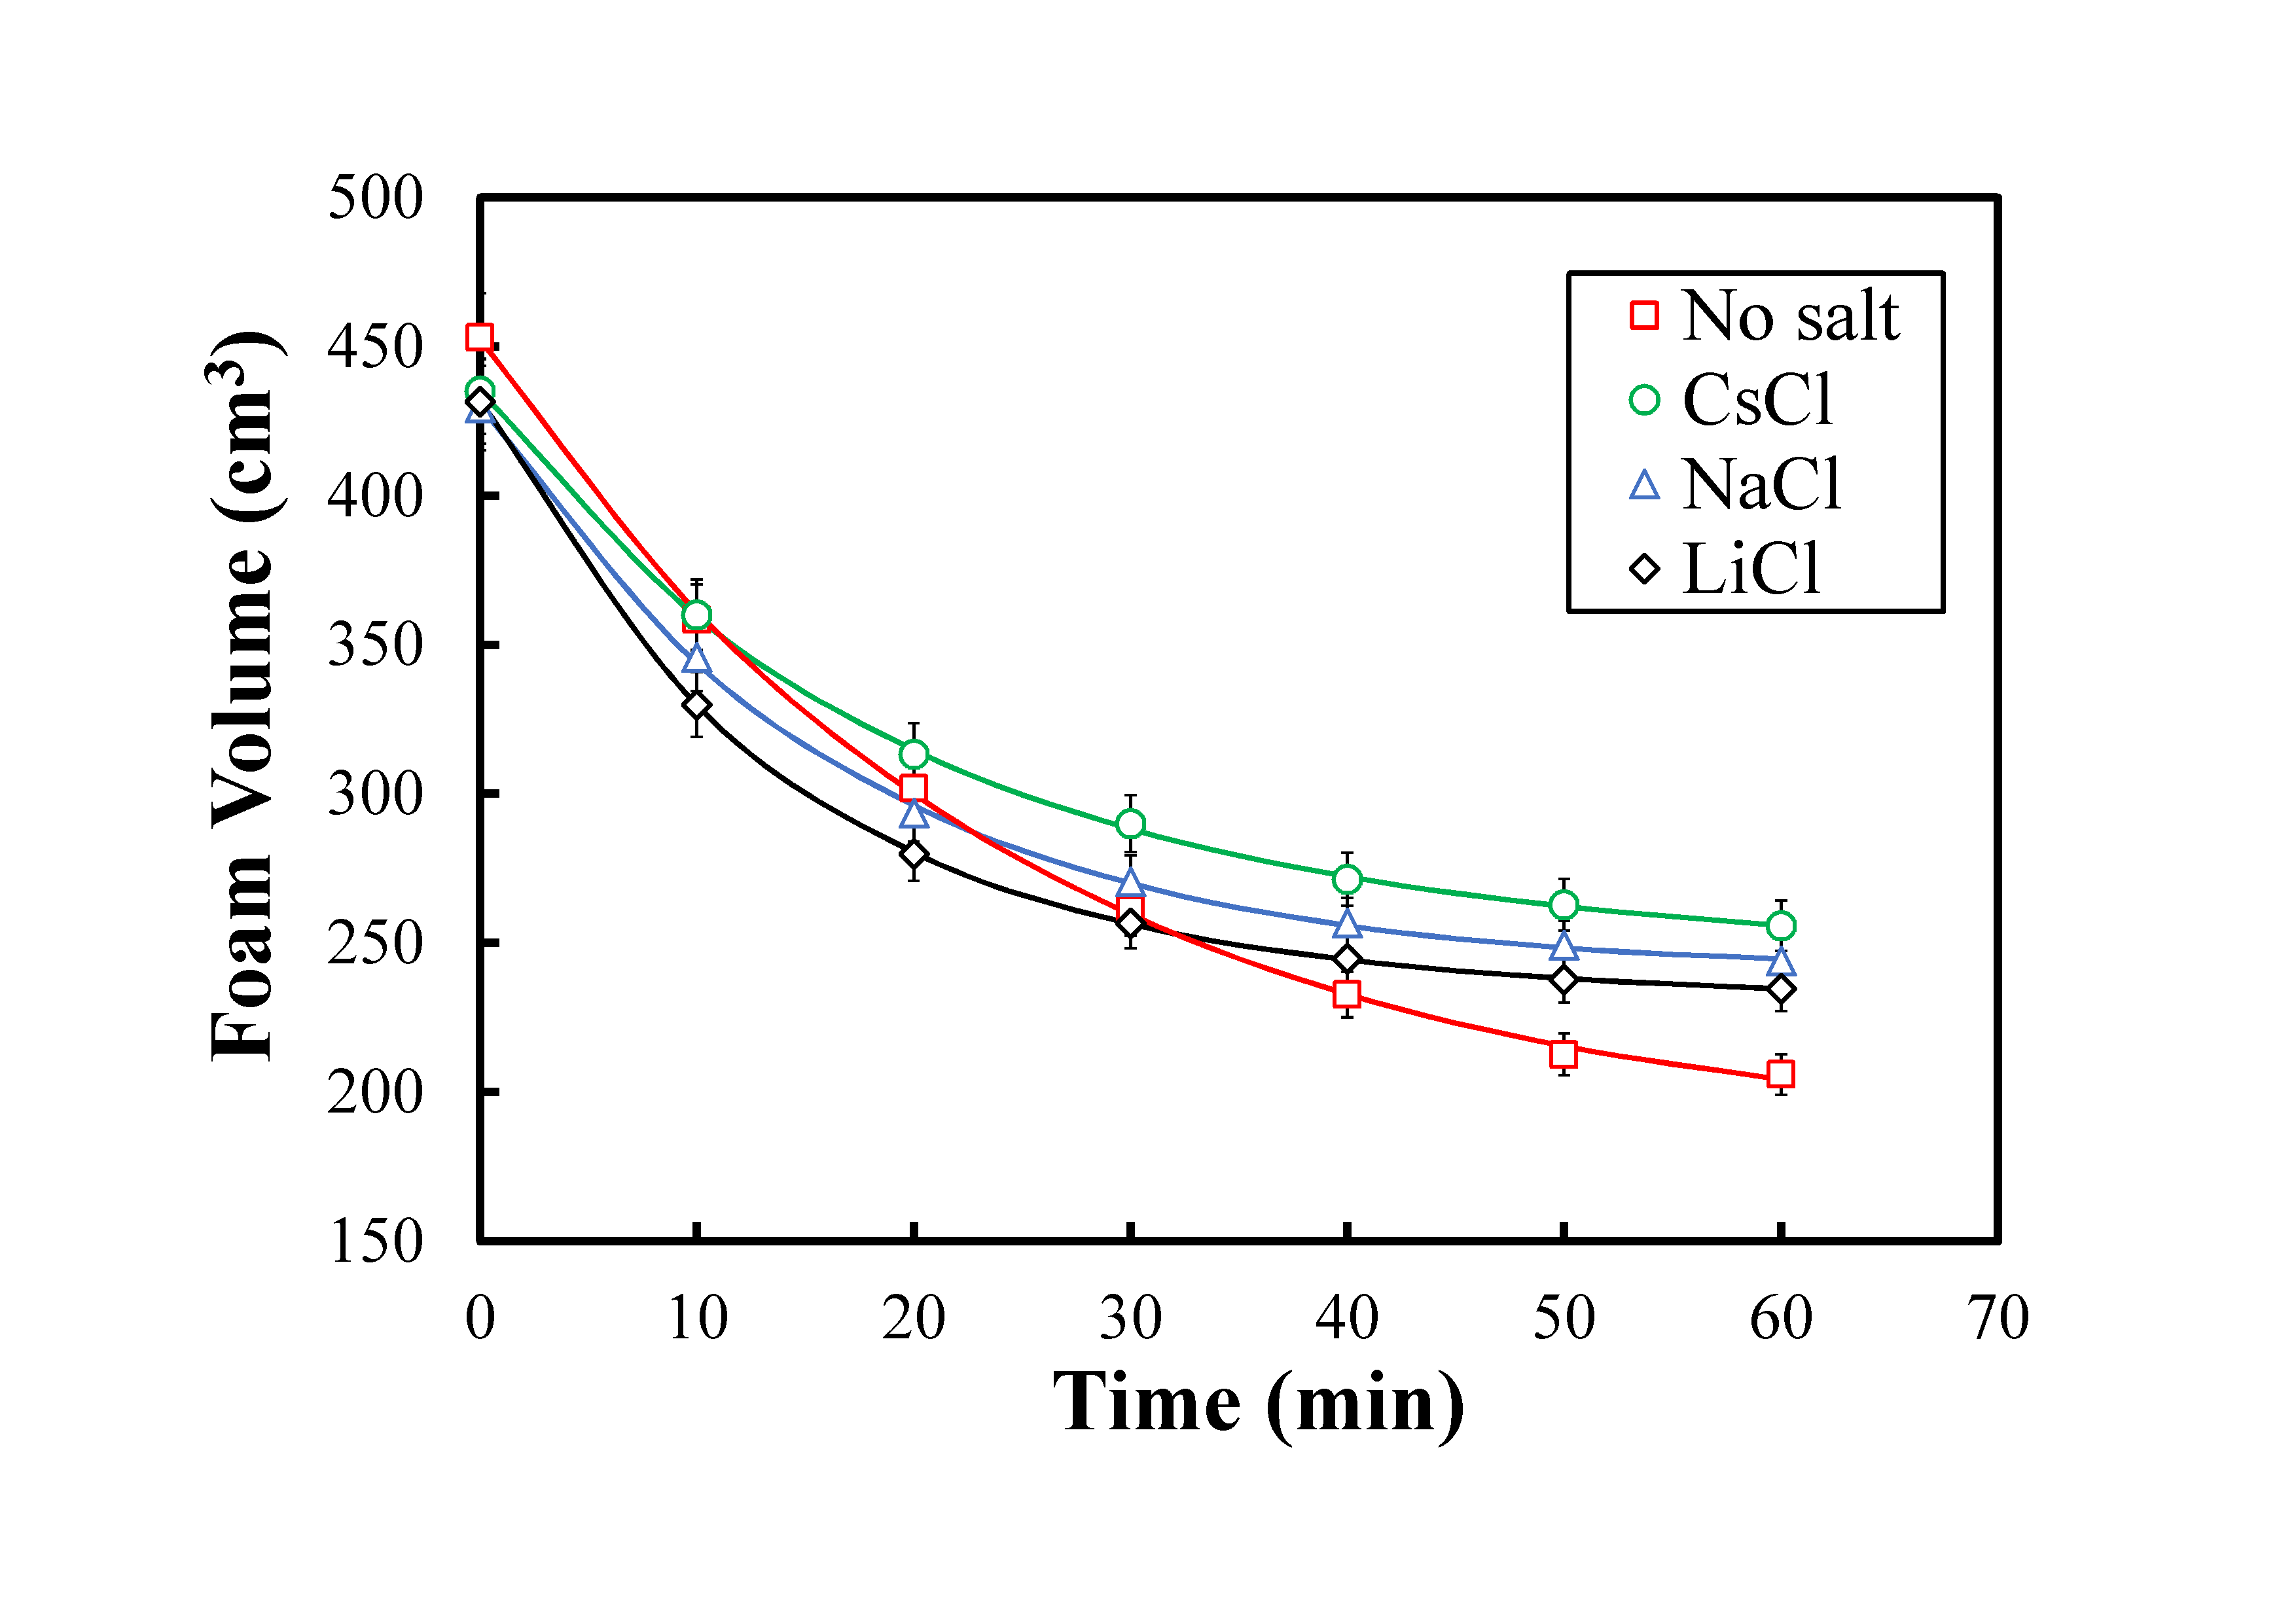 | 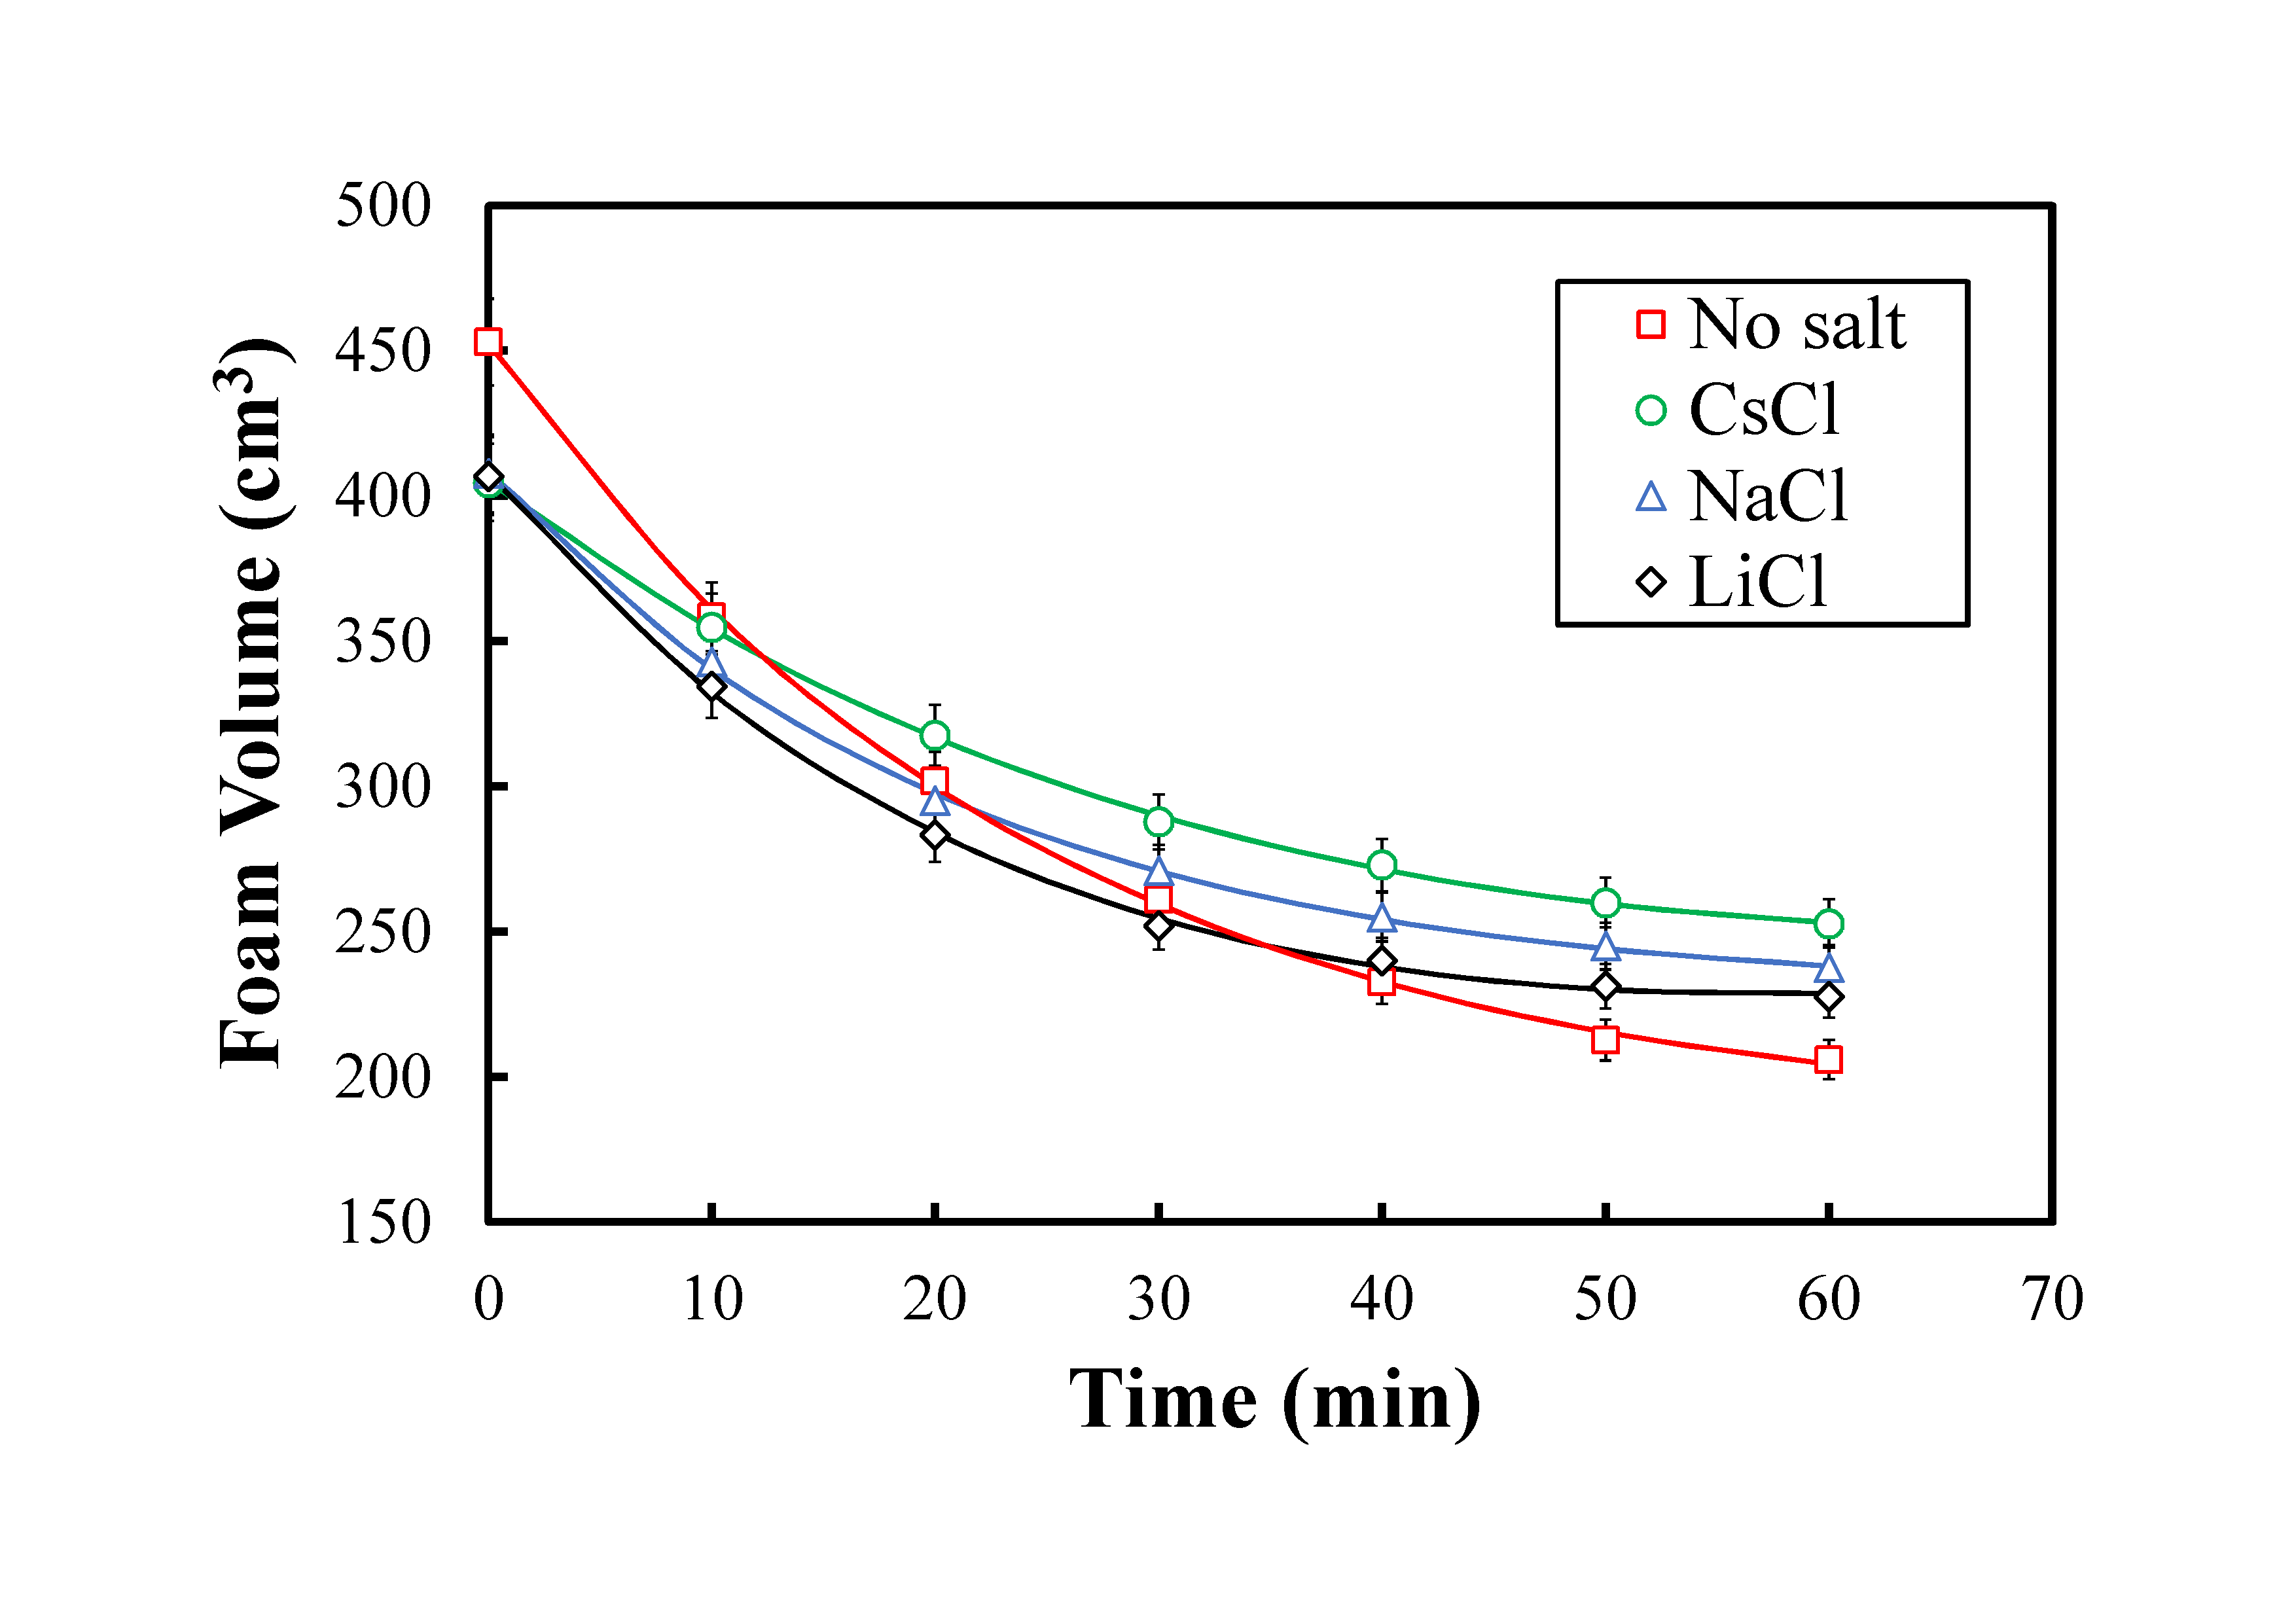 |
| --- | --- |
| (a) | (b) |
| 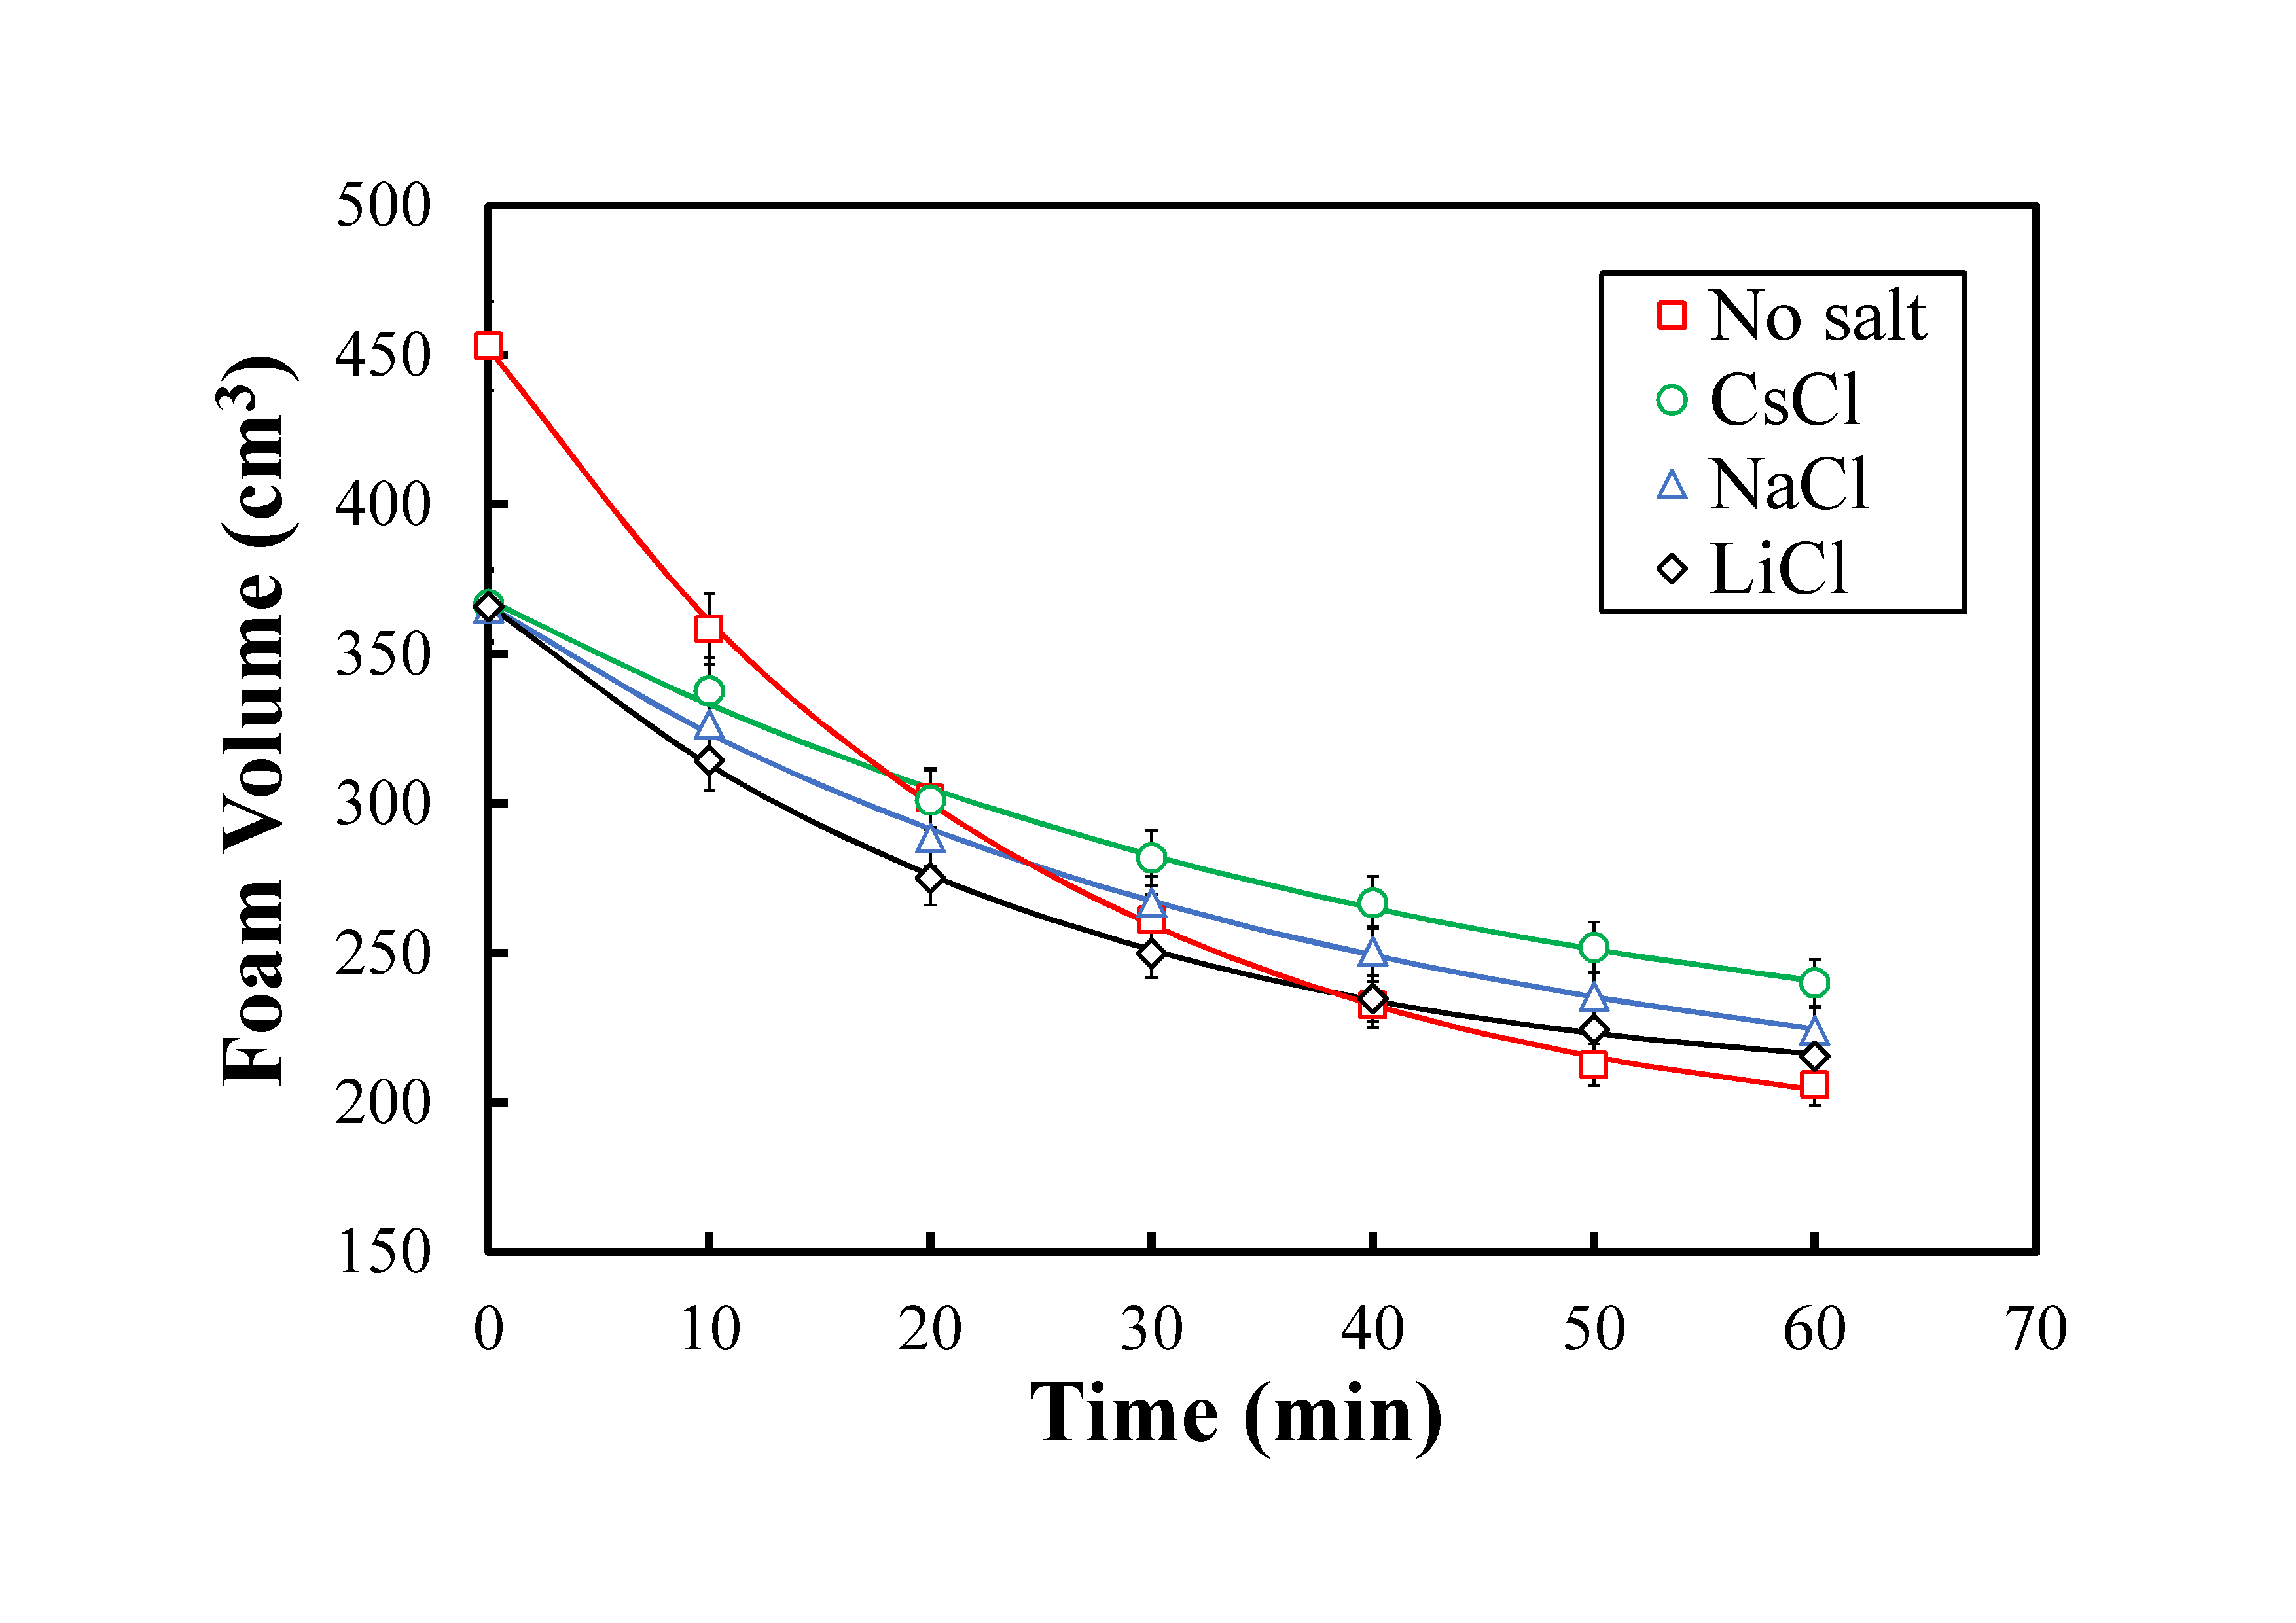 | |
| (c) | |
| **Figure S3.** A comparative study of the lifetime of foams at 1.2 mol m–3 DDAPS at (a) 10, (b) 50, and (c) 100 mol m–3 CsCl, NaCl, and LiCl. The solid lines indicate the di-exponential fits. | |

| 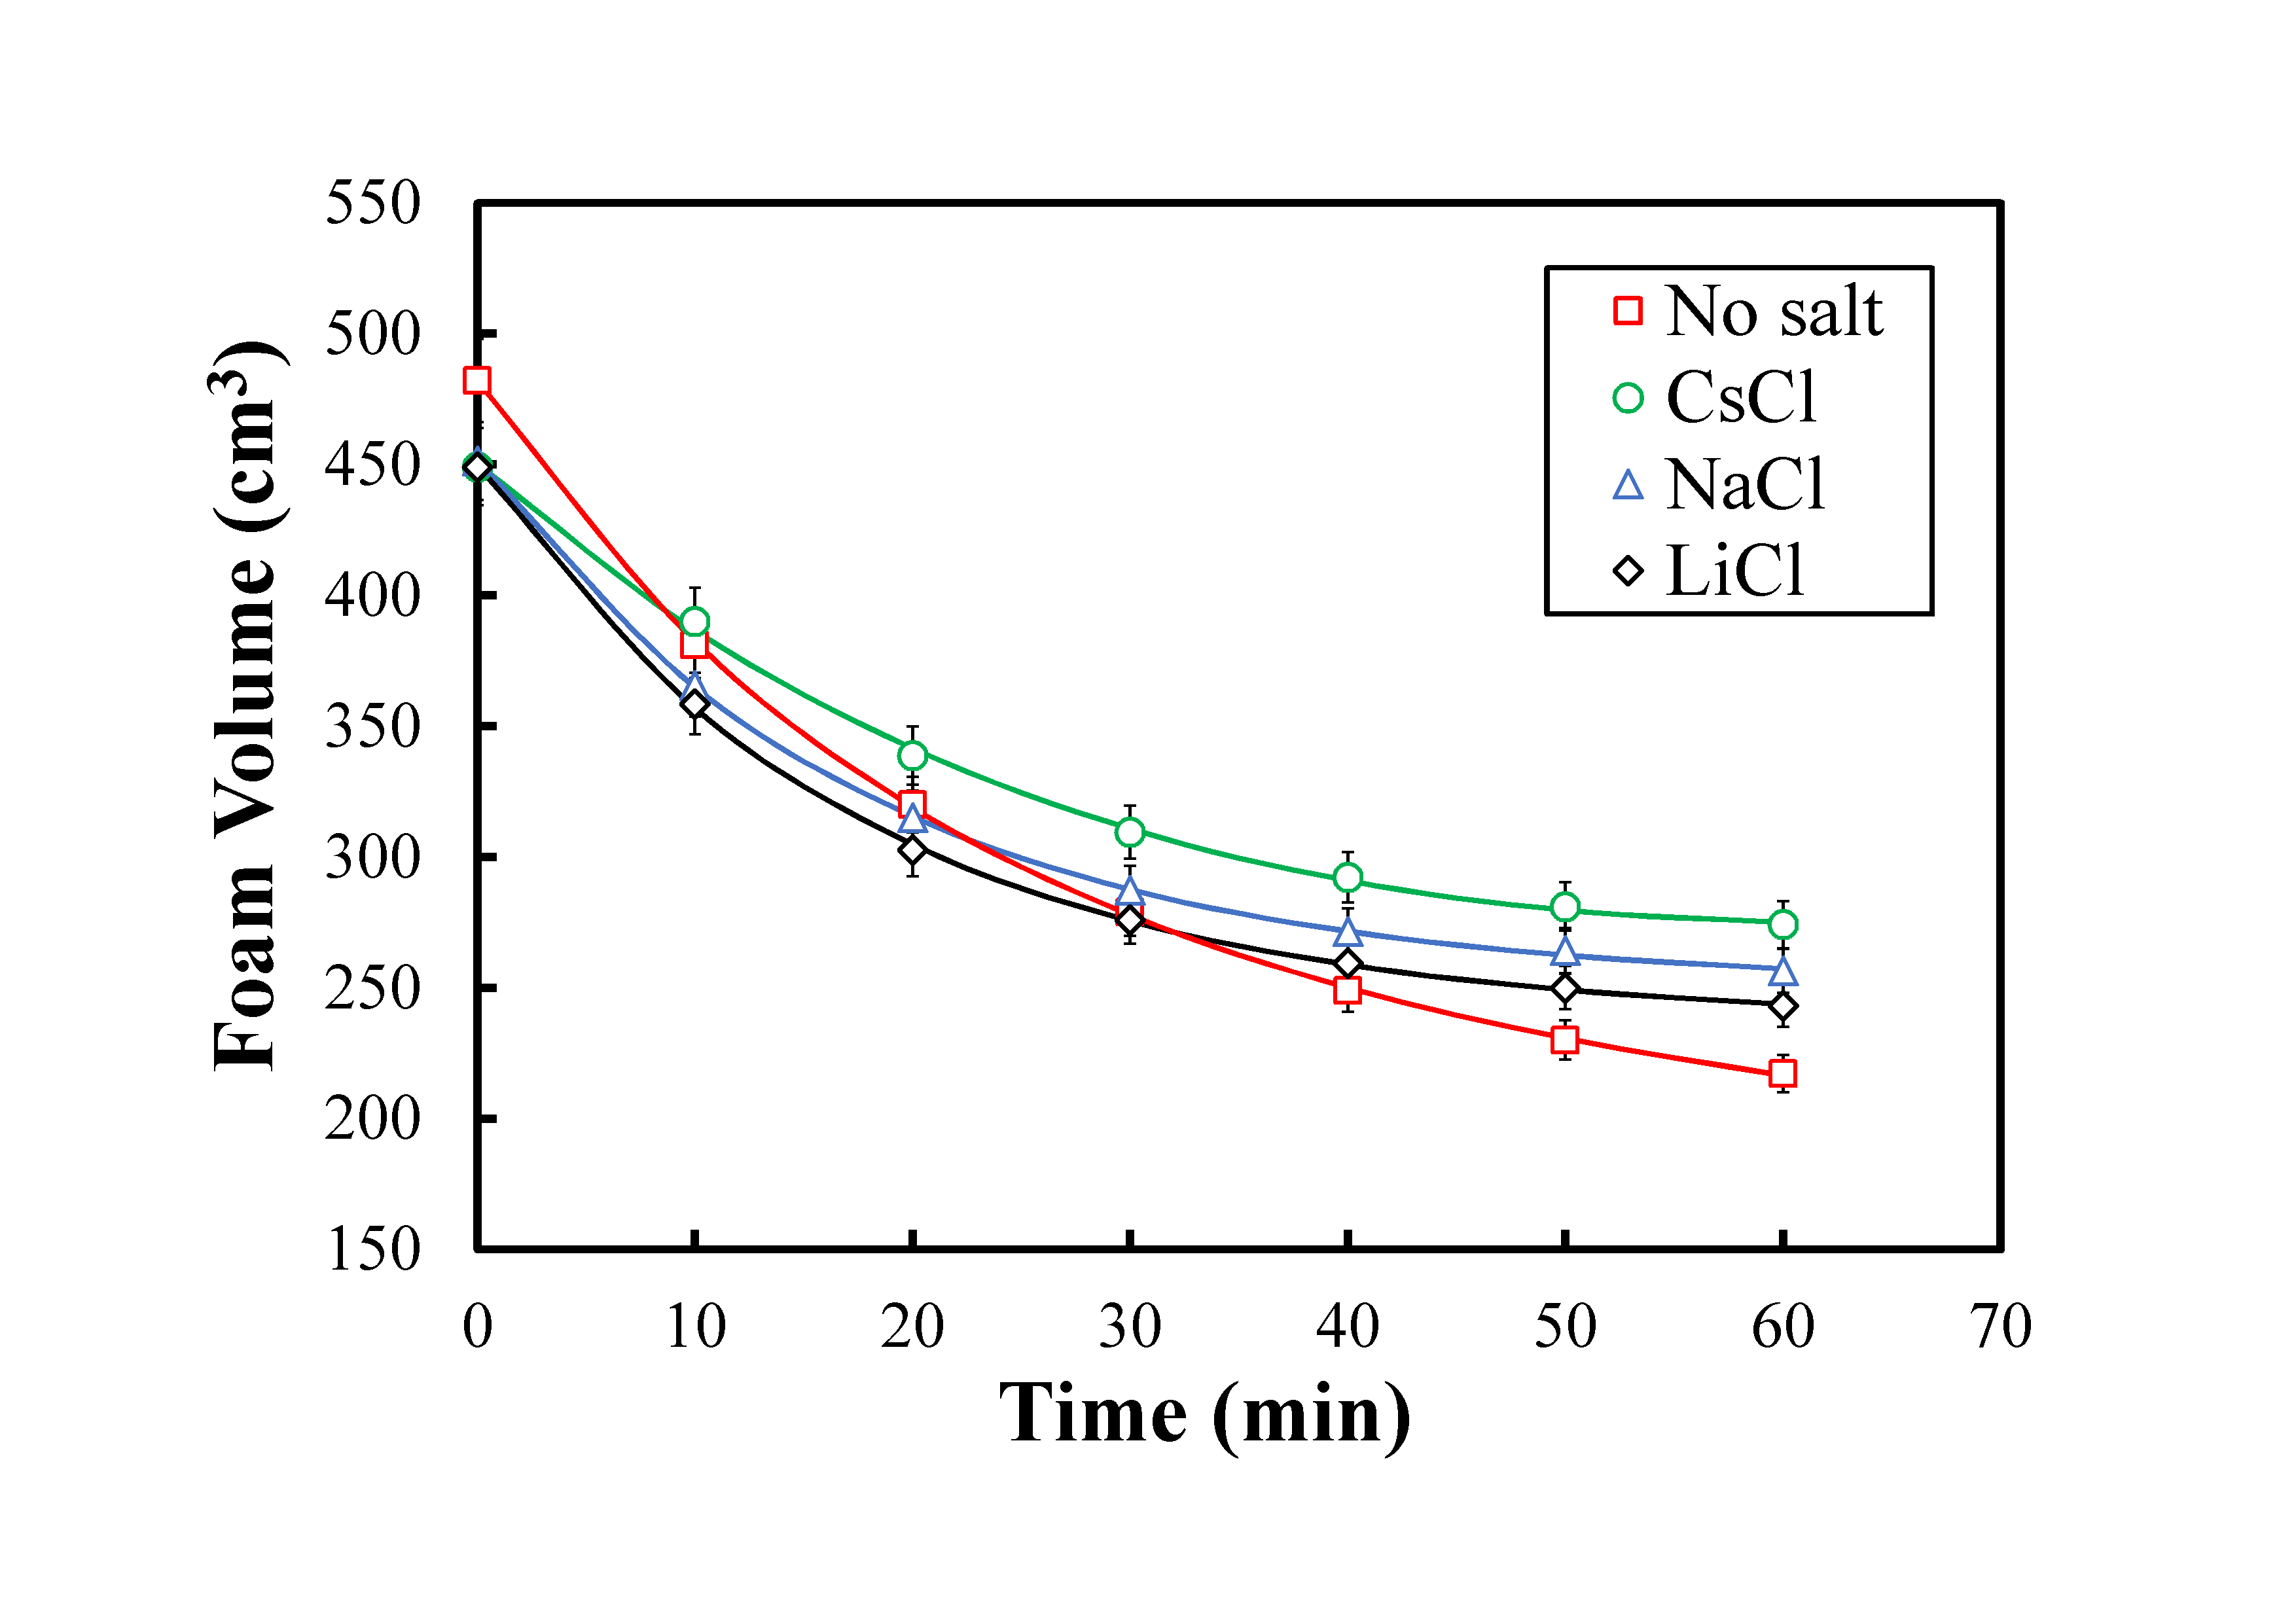 | 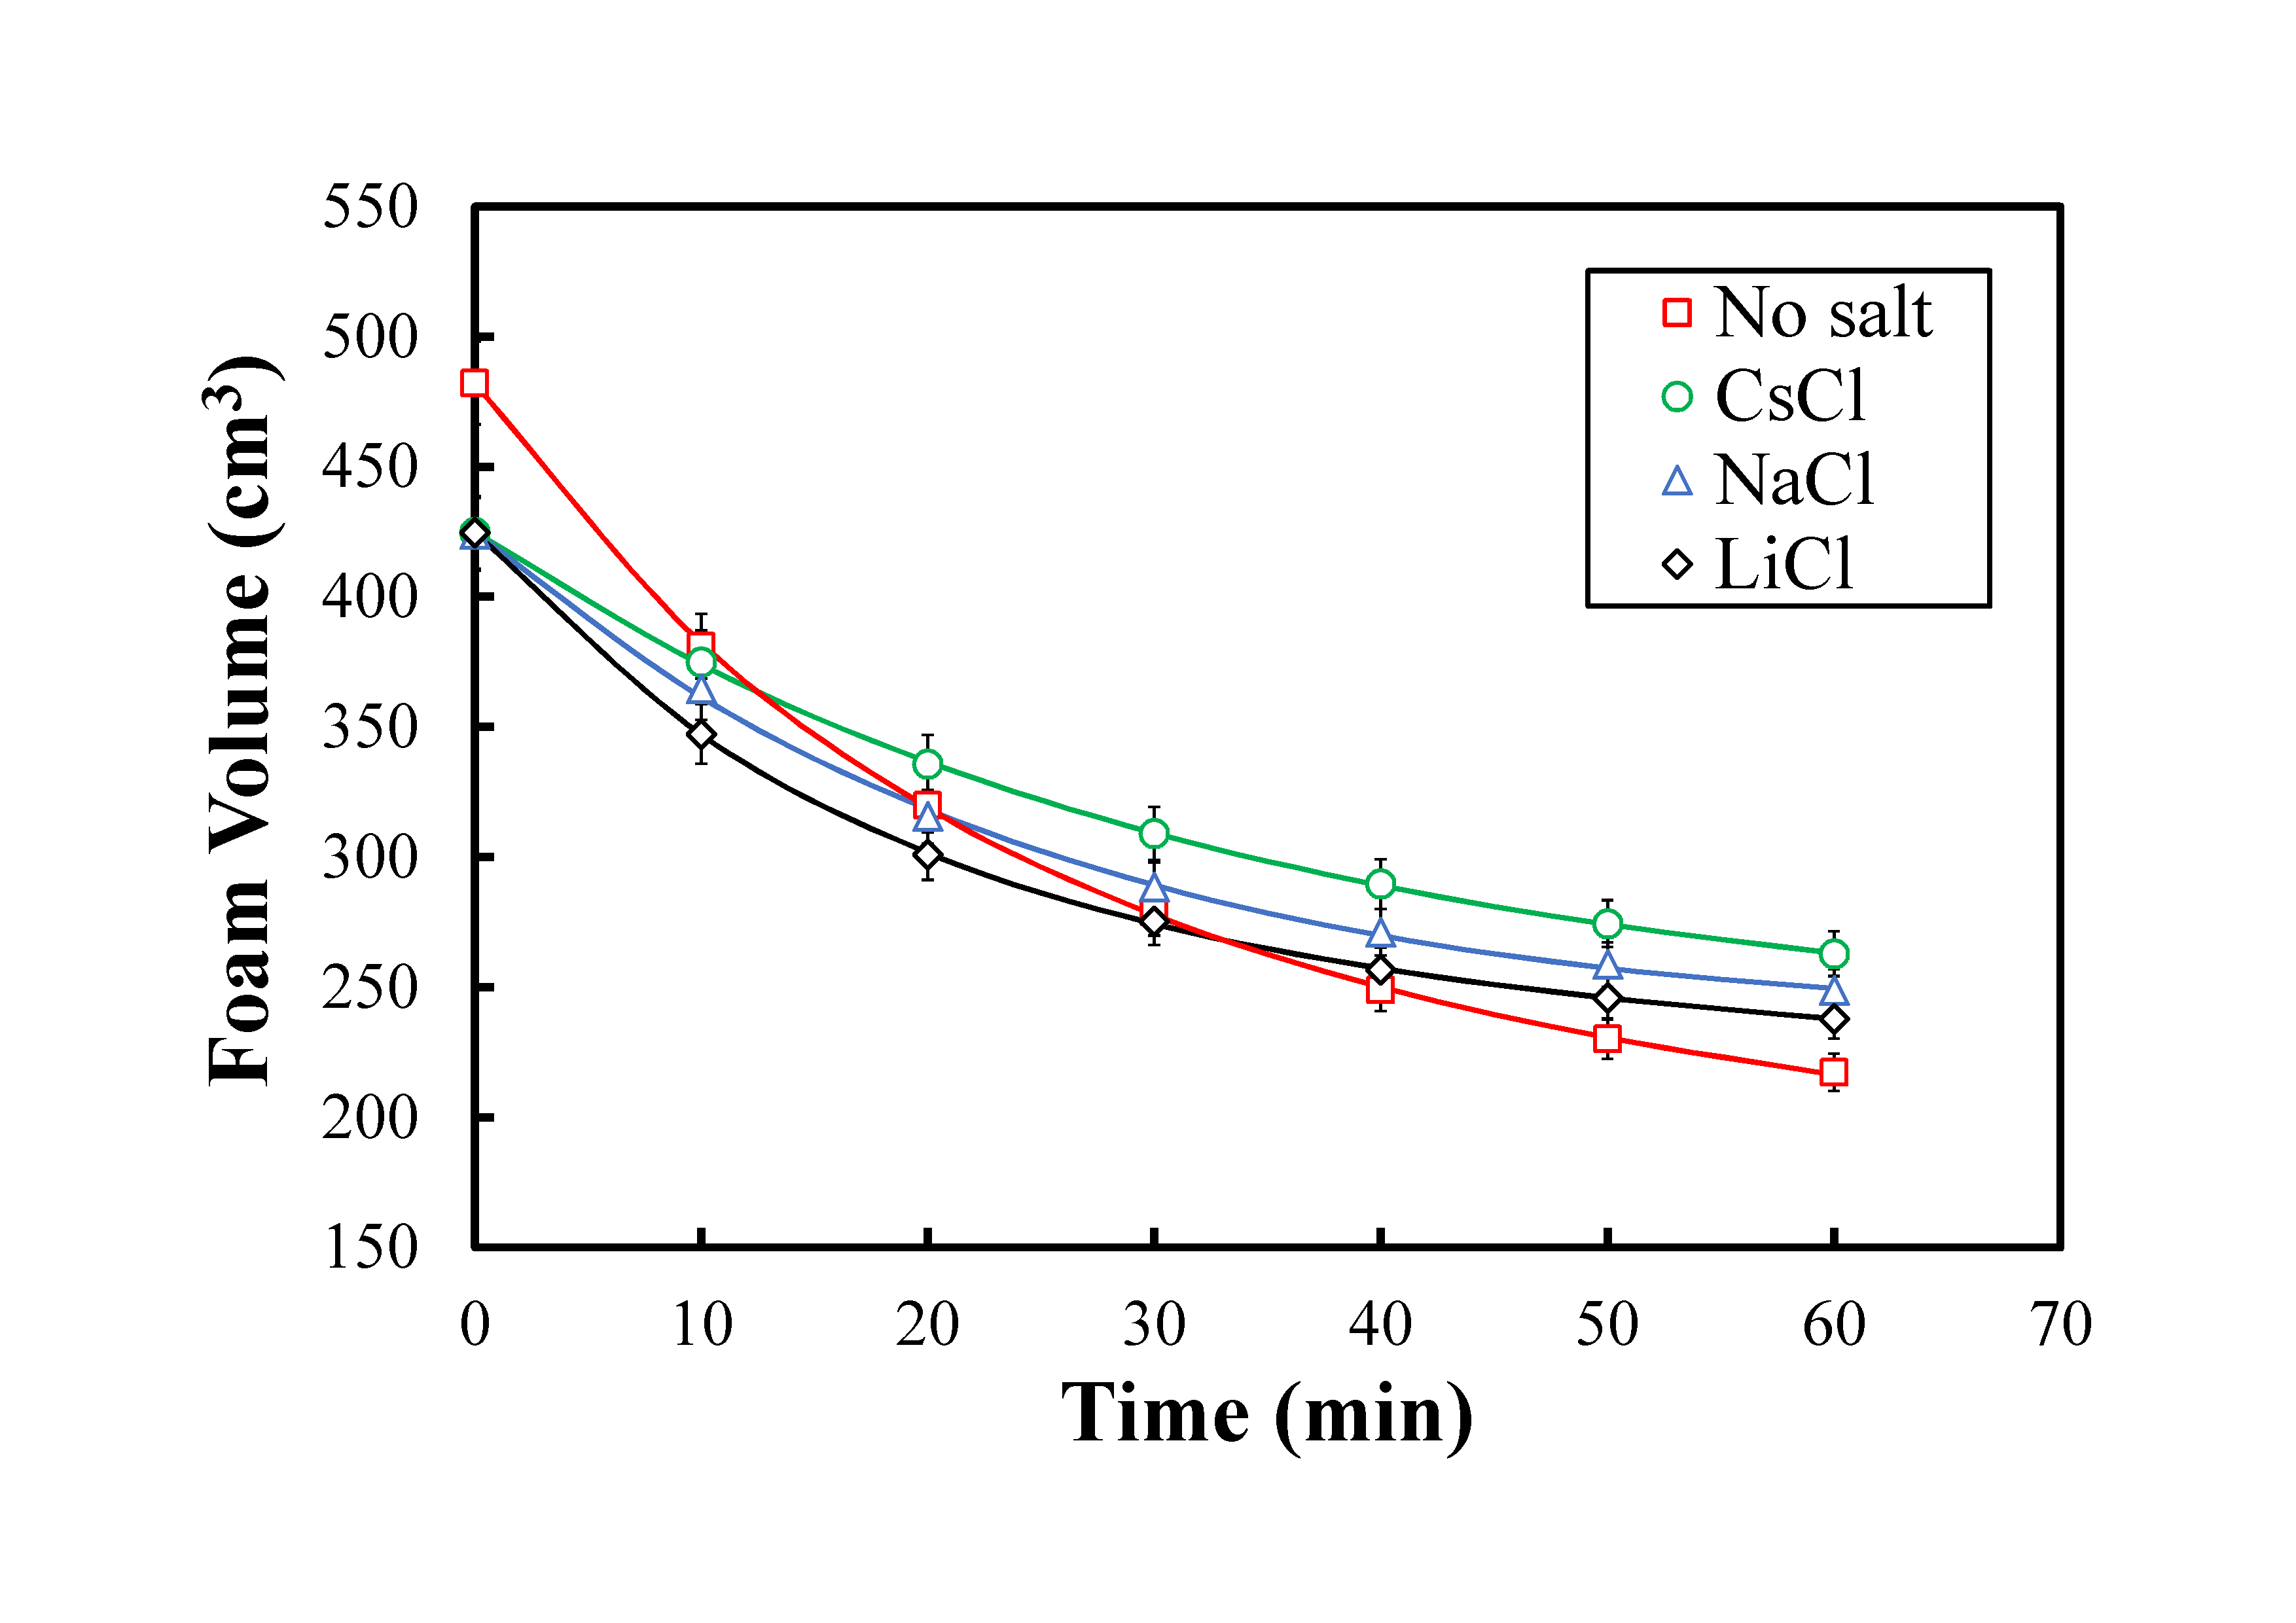 |
| --- | --- |
| (a) | (b) |
|  |  |
| 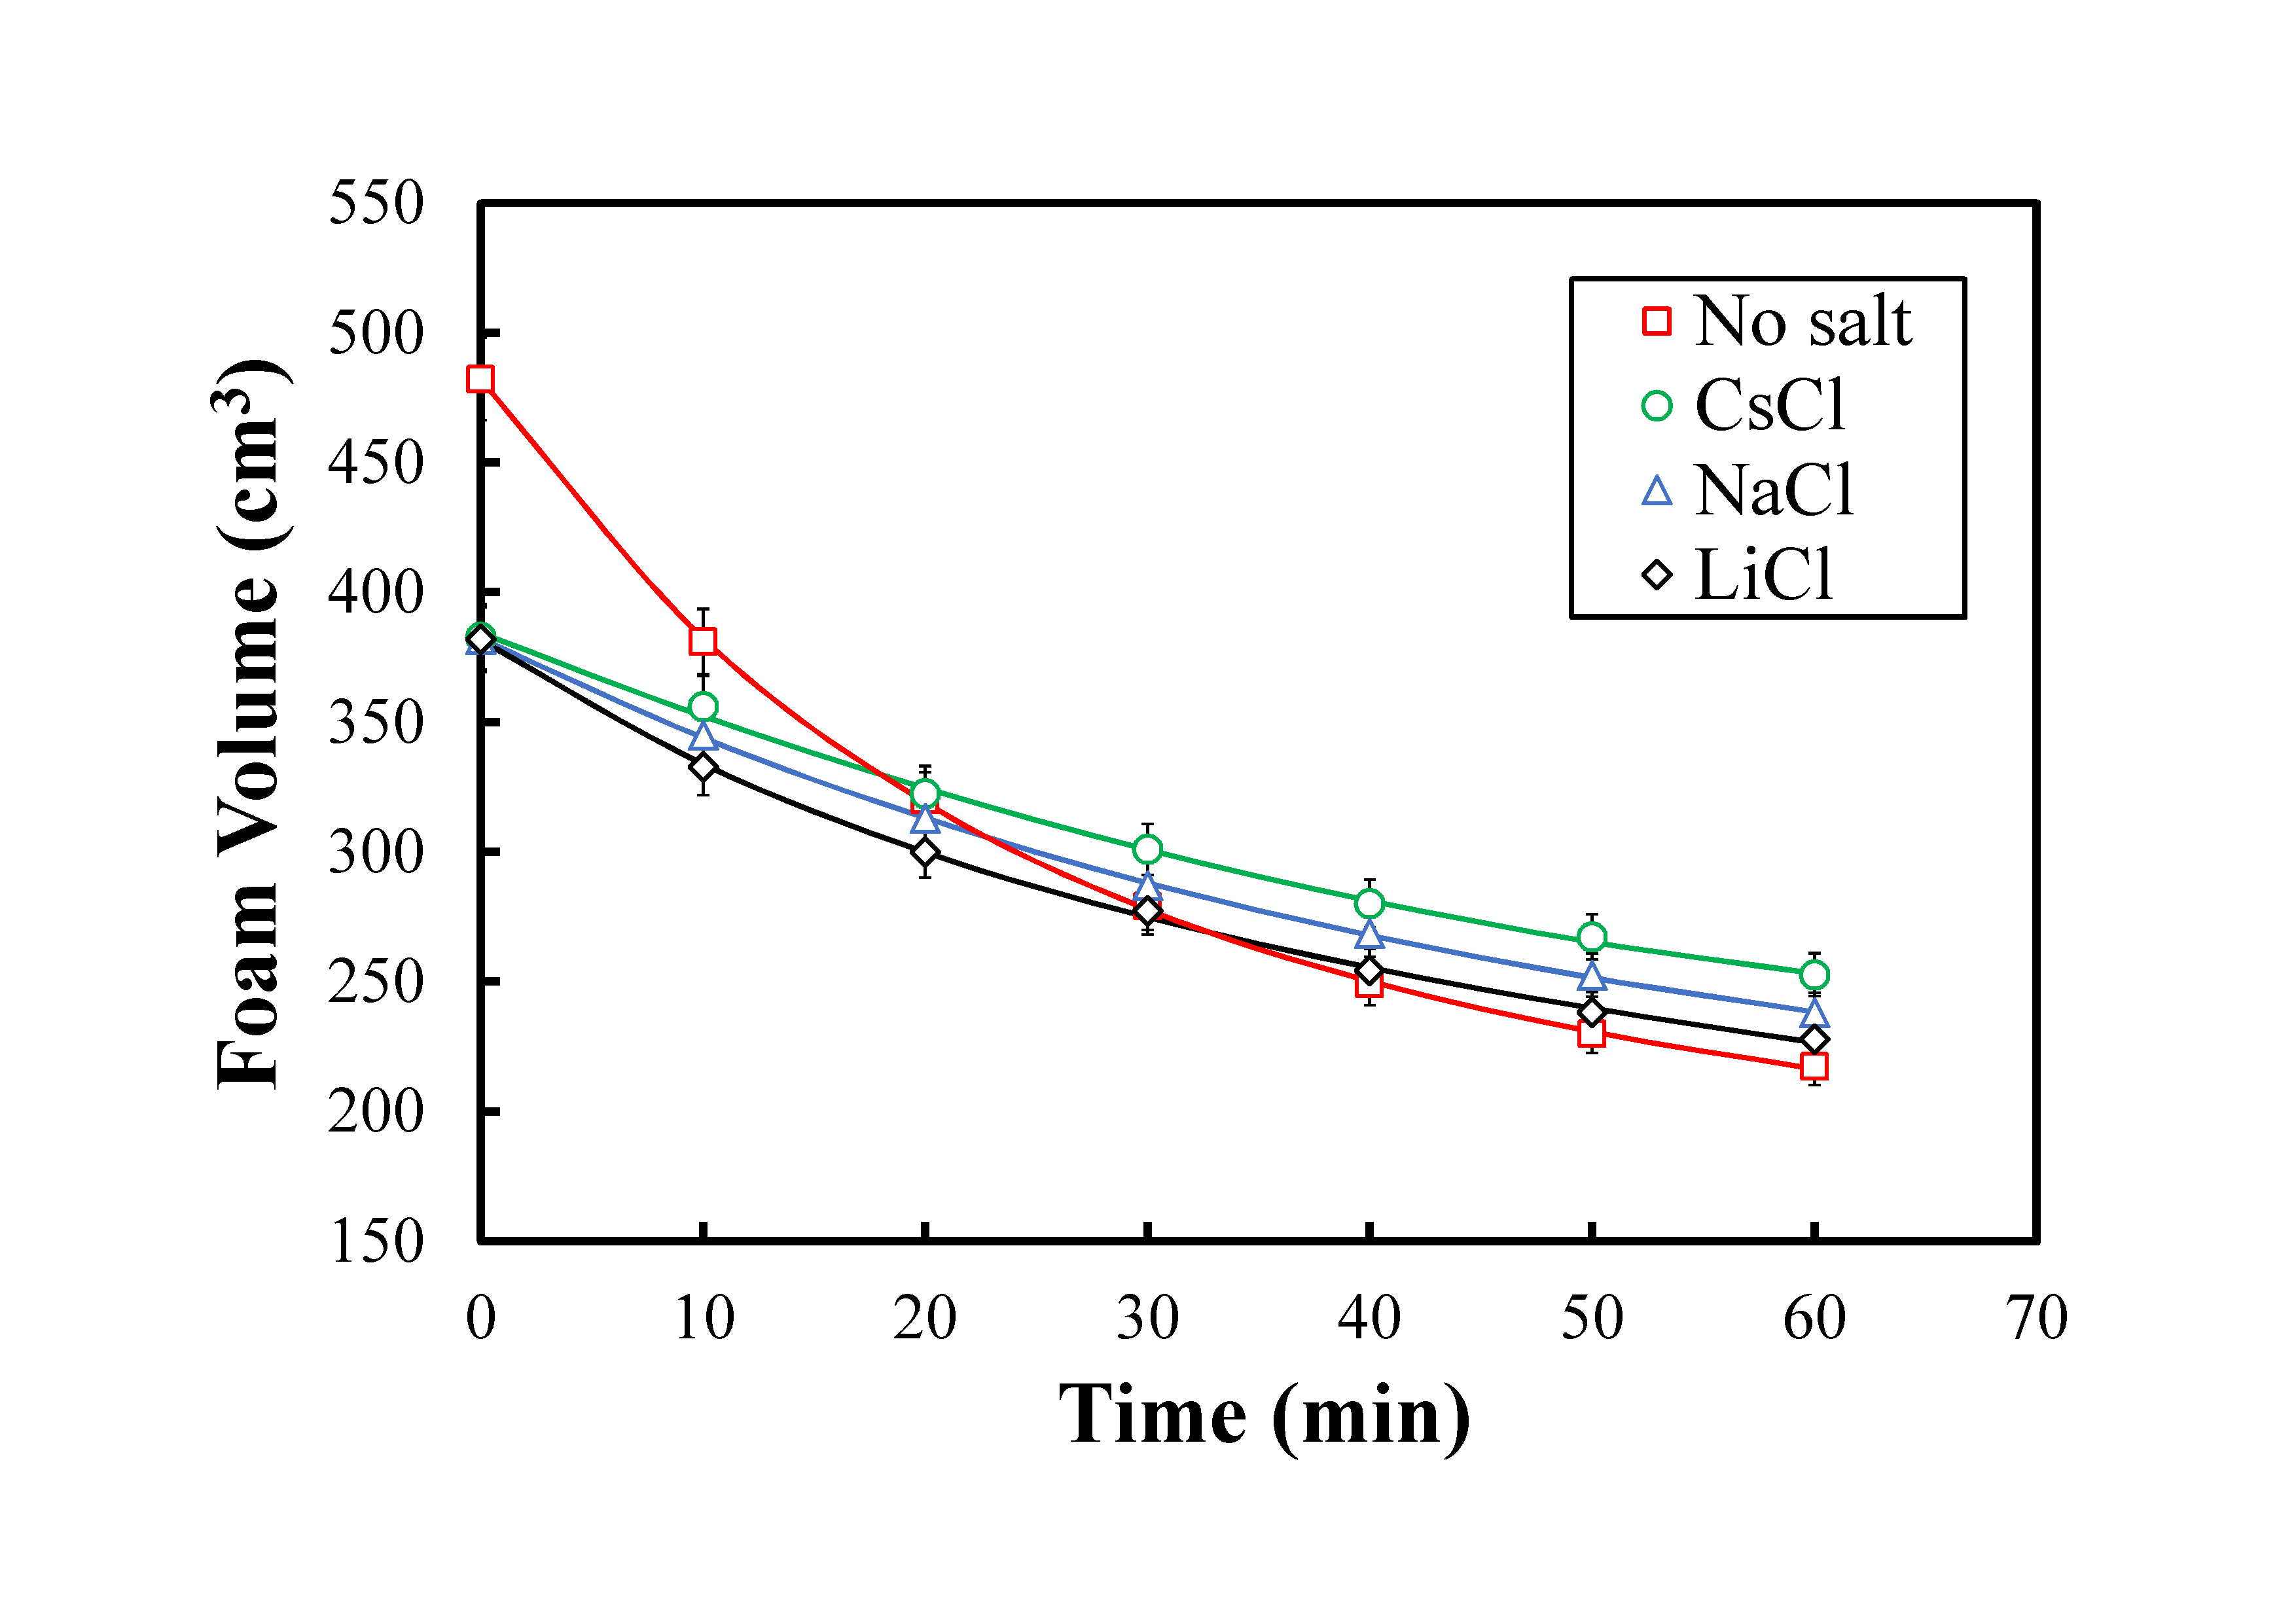 | |
| (c) | |
| **Figure S4.** A comparative study of the lifetime of foams at 1.8 mol m–3 DDAPS at (a) 10, (b) 50, and (c) 100 mol m–3 CsCl, NaCl, and LiCl. The solid lines indicate the di-exponential fits. | |
|  | |
